# Supplementary material for: Aldiminium Cations as Countercations to Discrete Main Group Fluoroanions
Source: MDPI journal article supplement (doi:10.3390/molecules28176270), 2023-08-27
Supplement: s1 [file s1]

## Supporting information

# Aldiminium Cations as Counteranions to Discrete Main Group Fluoroanions

Evelin Gruden,<sup>1</sup> and Gašper Tavčar<sup>1,\*</sup>

<sup>1</sup> Department of Inorganic Chemistry and Technology, Jožef Stefan Institute, Jamova 39, 1000 Ljubljana, Slovenia

\* Correspondence: [gasper.tavcar@ijs.si](mailto:gasper.tavcar@ijs.si) (G.T)

### Table of content

|      |                                                      |    |
|------|------------------------------------------------------|----|
| S1   | NMR spectroscopy .....                               | 2  |
| S1.1 | [ <sup>Me</sup> CAACH][BF <sub>4</sub> ] .....       | 2  |
| S1.2 | [ <sup>Me</sup> CAACH][SiF <sub>5</sub> ].....       | 4  |
| S1.3 | [ <sup>Me</sup> CAACH][GeF <sub>5</sub> ] .....      | 6  |
| S1.4 | [ <sup>Me</sup> CAACH][(THF)SnF <sub>5</sub> ] ..... | 8  |
| S1.5 | [ <sup>Me</sup> CAACH][PF <sub>6</sub> ].....        | 10 |
| S1.6 | [ <sup>Me</sup> CAACH][AsF <sub>6</sub> ].....       | 12 |
| S1.7 | [ <sup>Me</sup> CAACH][SbF <sub>6</sub> ].....       | 14 |
| S2   | Raman spectroscopy .....                             | 16 |
| S3   | Crystal Structure Data.....                          | 18 |
| S3.1 | Crystal structures of selected compounds .....       | 24 |

# S1 NMR spectroscopy

## S1.1 [<sup>Me</sup>CAACH][BF<sub>4</sub>]

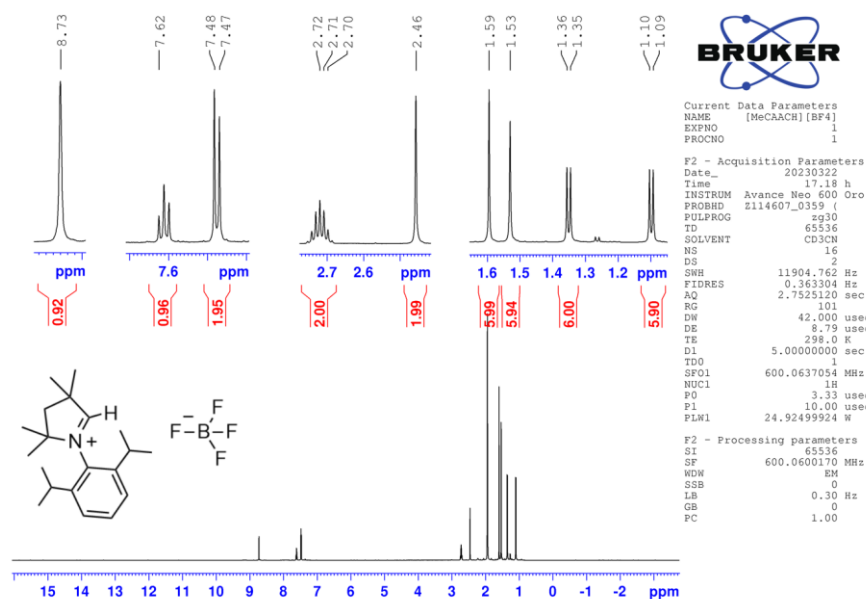

**Figure S1.** <sup>1</sup>H NMR spectrum of [<sup>Me</sup>CAACH][BF<sub>4</sub>] in acetonitrile solution.

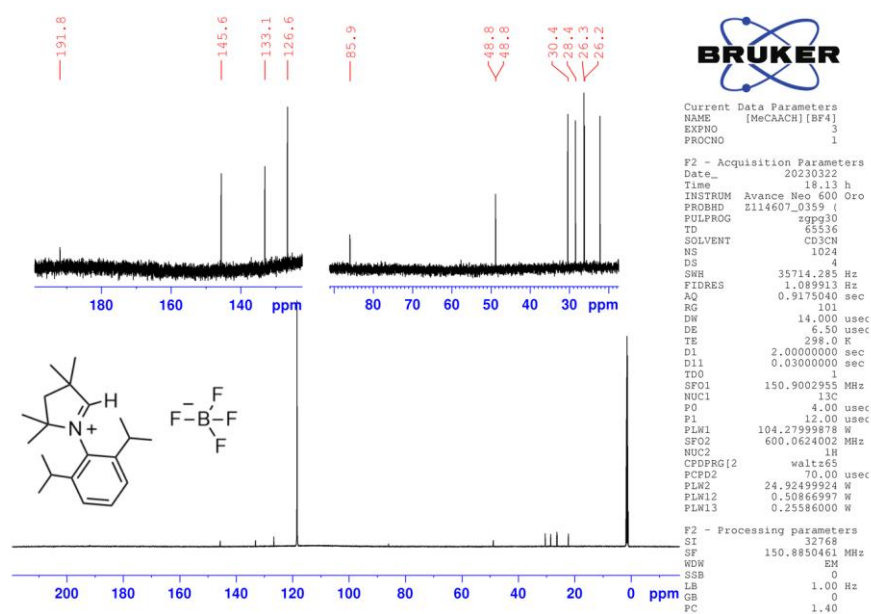

**Figure S2.** <sup>13</sup>C{<sup>1</sup>H} NMR spectrum of [<sup>Me</sup>CAACH][BF<sub>4</sub>] in acetonitrile solution.

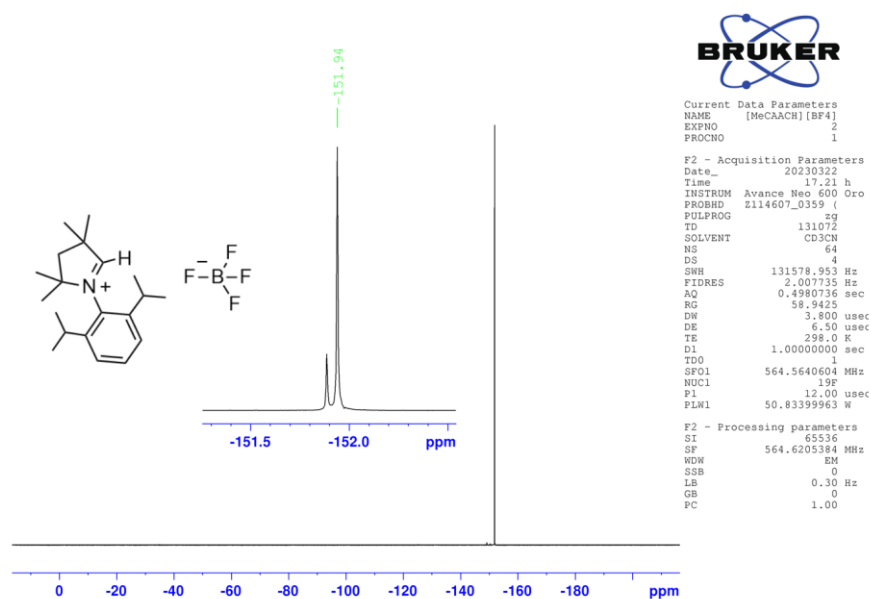

**Figure S3.**  $^{19}\text{F}$  NMR spectrum of  $[\text{MeCAACH}][\text{BF}_4]$  in acetonitrile solution.

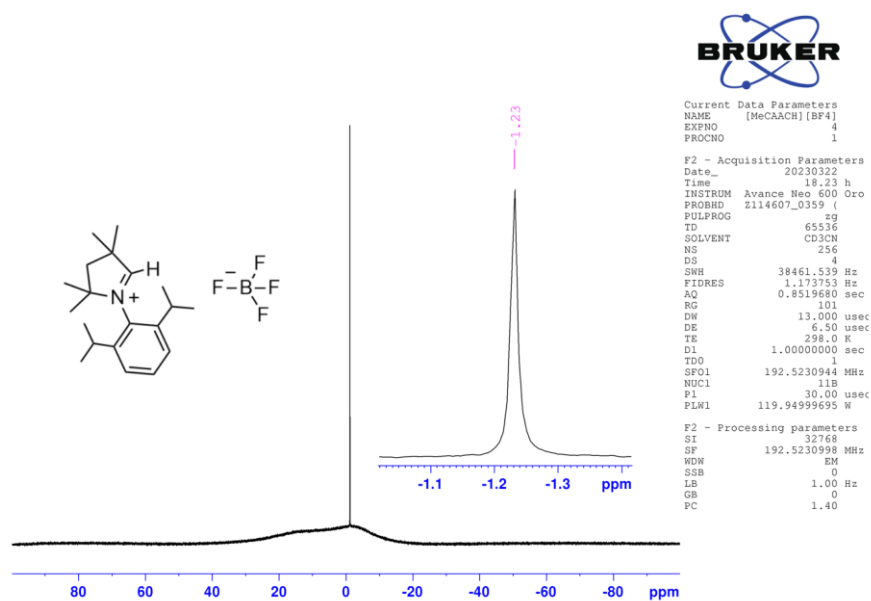

**Figure S4.**  $^{11}\text{B}$  NMR spectrum of  $[\text{MeCAACH}][\text{BF}_4]$  in acetonitrile solution.

## S1.2 [<sup>Me</sup>CAACH][SiF<sub>5</sub>]

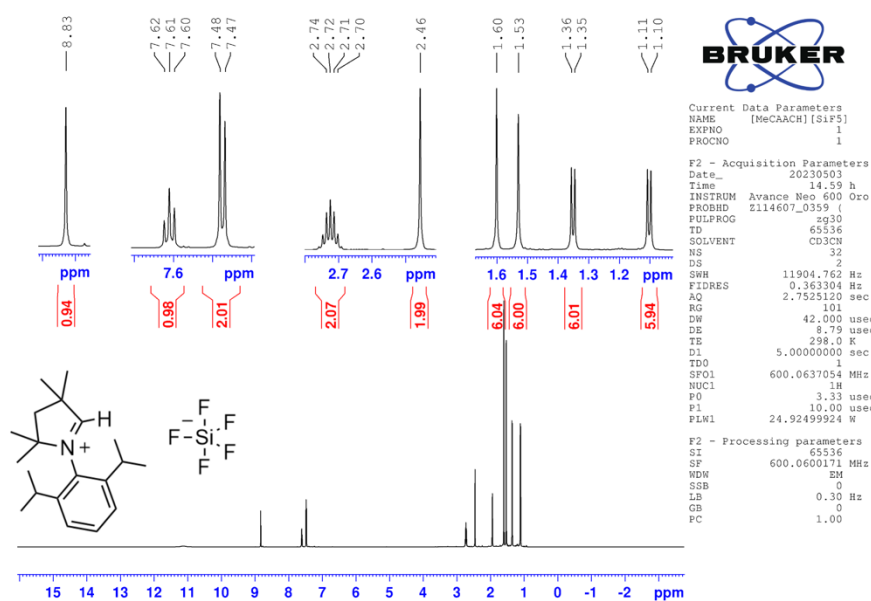

**Figure S5.** <sup>1</sup>H NMR spectrum of [<sup>Me</sup>CAACH][SiF<sub>5</sub>] in acetonitrile solution.

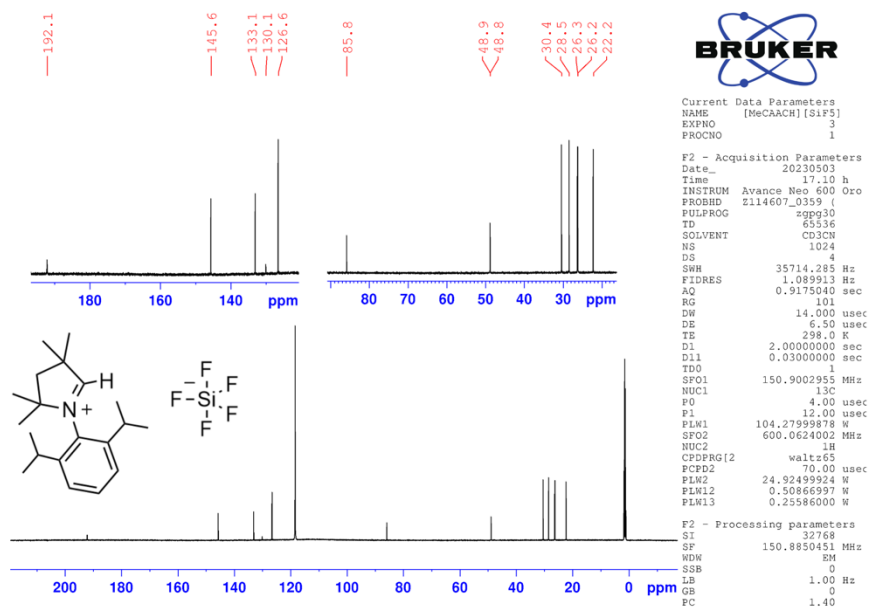

**Figure S6.** <sup>13</sup>C{<sup>1</sup>H} NMR spectrum of [<sup>Me</sup>CAACH][SiF<sub>5</sub>] in acetonitrile solution.

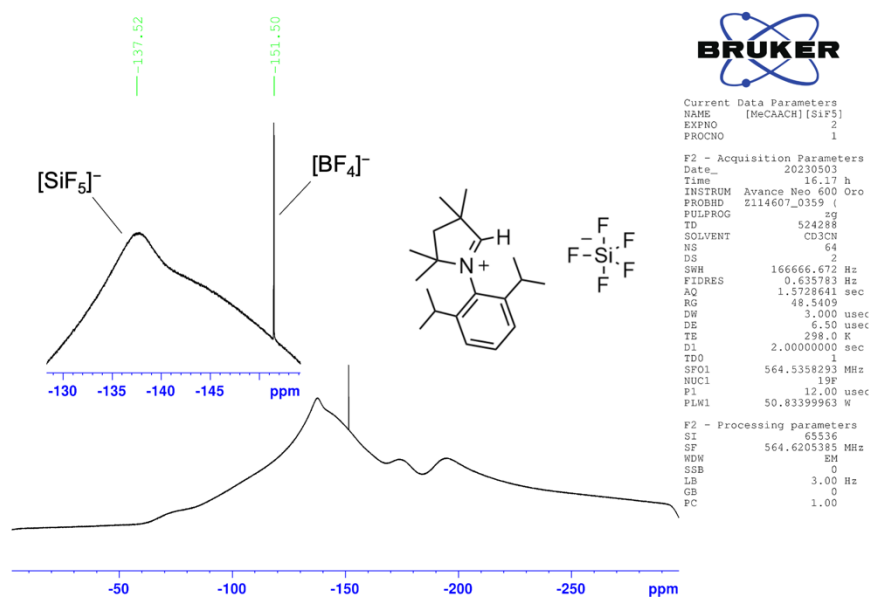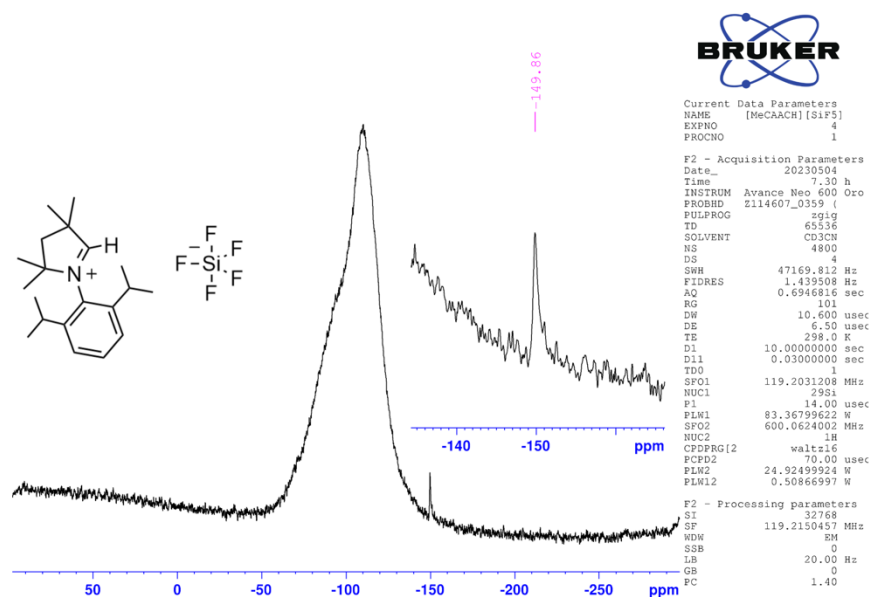

### S1.3 [<sup>Me</sup>CAACH][GeF<sub>5</sub>]

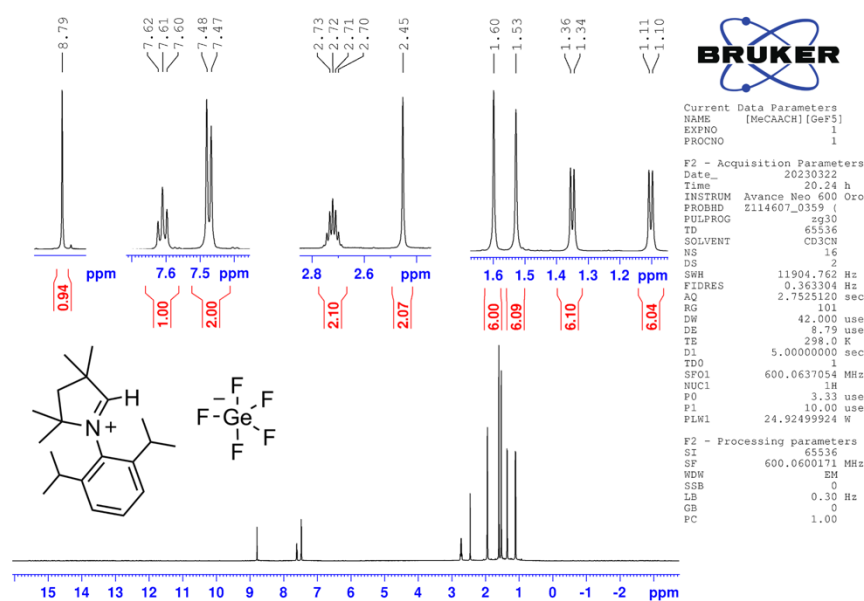

**Figure S9.** <sup>1</sup>H NMR spectrum of [<sup>Me</sup>CAACH][GeF<sub>5</sub>] in acetonitrile solution.

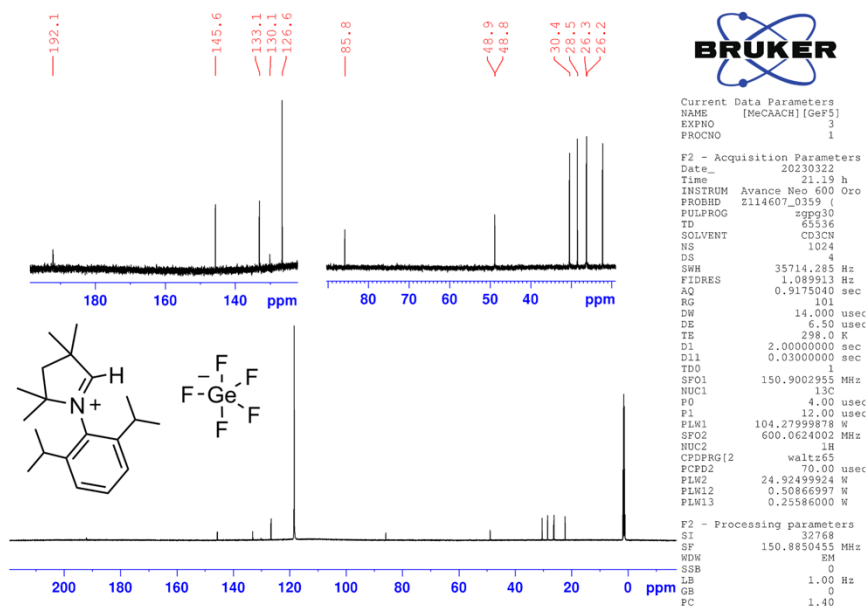

**Figure S10.** <sup>13</sup>C{<sup>1</sup>H} NMR spectrum of [<sup>Me</sup>CAACH][GeF<sub>5</sub>] in acetonitrile solution.

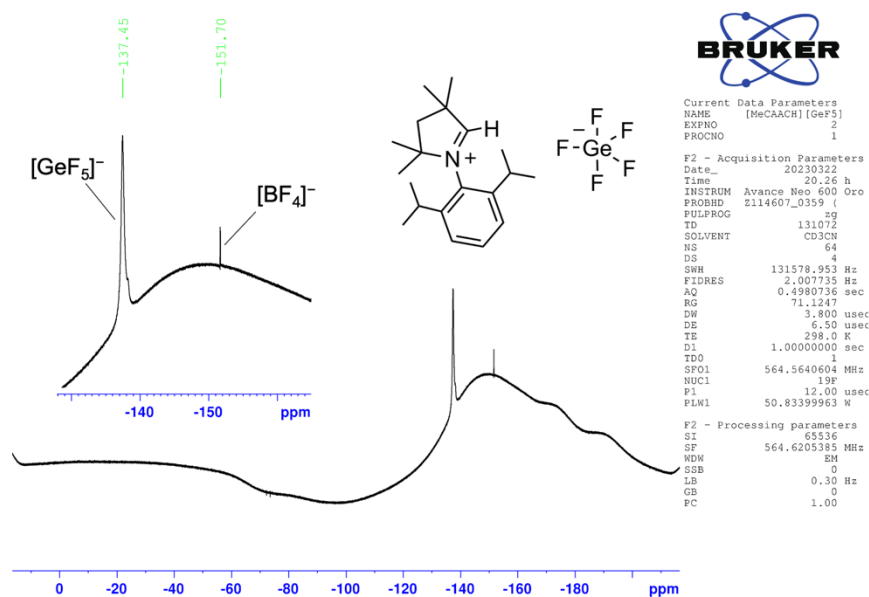

**Figure S11.**  $^{19}\text{F}$  NMR spectrum of  $[\text{MeCAACH}][\text{GeF}_5]$  in acetonitrile solution. The signal for  $[\text{BF}_4]^-$  anions is visible due to the contamination of the reaction mixture with residual  $\text{BF}_3$  gas in the vacuum line.

### S1.4 $[^{\text{Me}}\text{CAACH}][(\text{THF})\text{SnF}_5]$

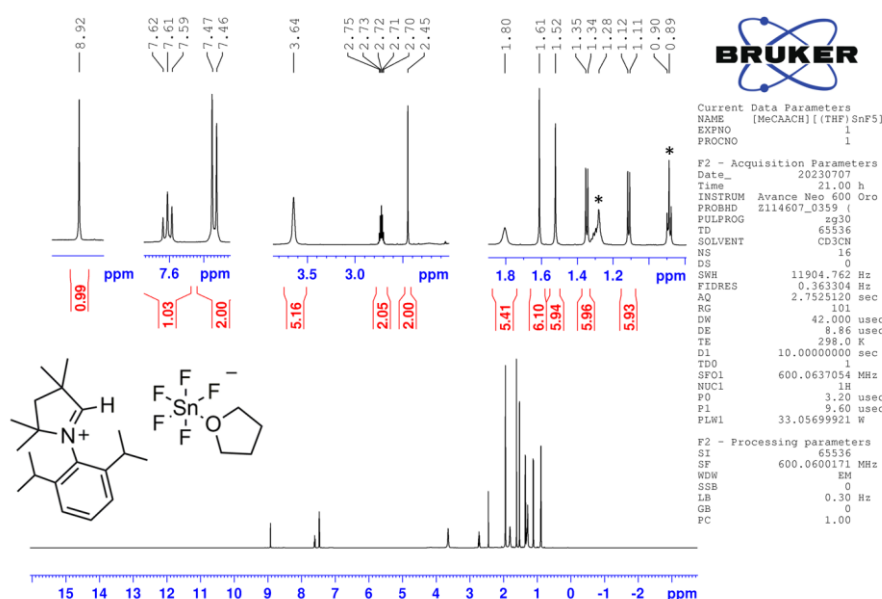

**Figure S12.**  $^1\text{H}$  NMR spectrum of  $[\text{MeCAACH}][(\text{THF})\text{SnF}_5]$  in acetonitrile solution. The sample contains small amounts of residual THF and hexane. This is due to the fact, that the sample used was crystallized from the mixture of THF and hexane. Peaks at 1.28 ppm (m, 8H) and 0.89 ppm (t, 6H,  $J = 7.0$  Hz) marked with \* belong to hexane.

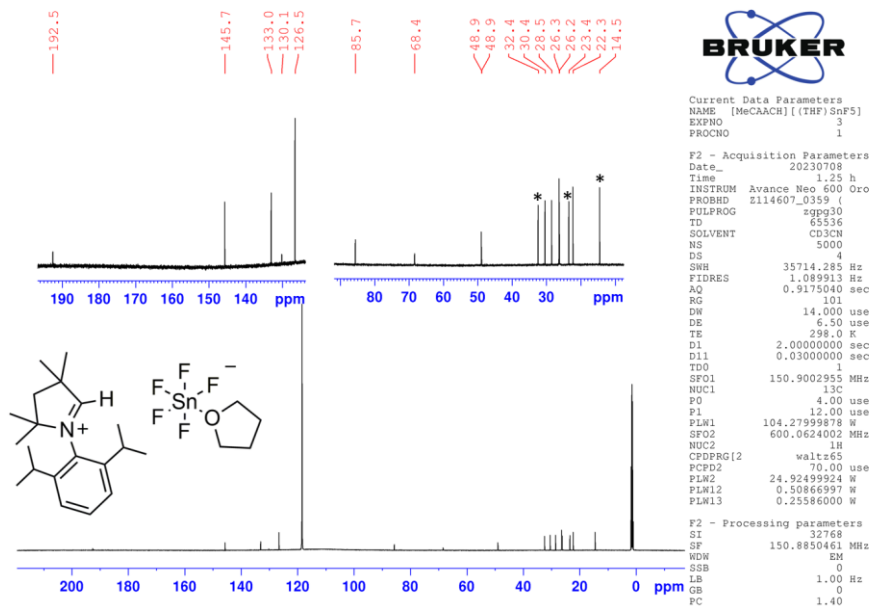

**Figure S13.**  $^{13}\text{C}\{^1\text{H}\}$  NMR spectrum of  $[\text{MeCAACH}][(\text{THF})\text{SnF}_5]$  in acetonitrile solution. The sample contains small amounts of residual THF and hexane. This is due to the fact, that the sample used was crystallized from the mixture of THF and hexane. Peaks at 32.4 ppm, 23.4 ppm and 14.5 ppm marked with \* belong to hexane.



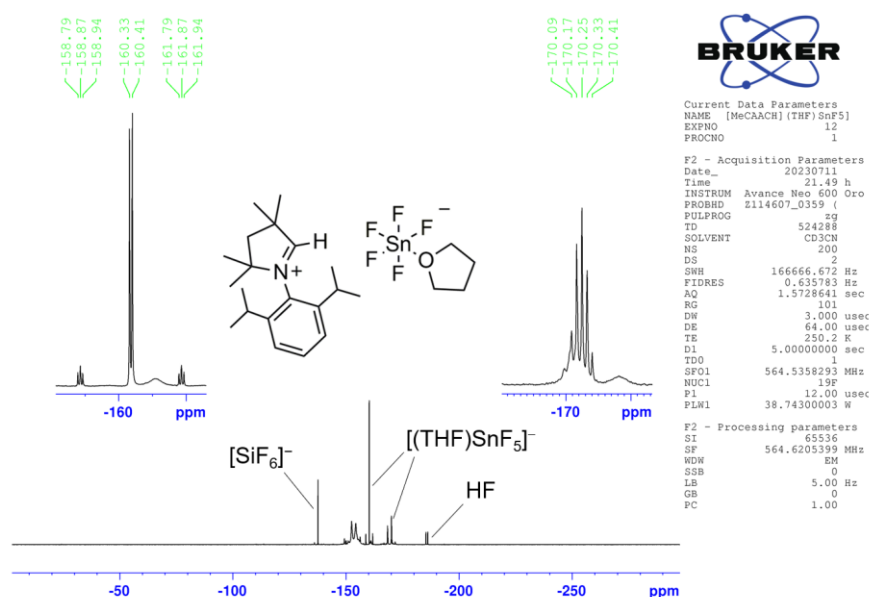

**Figure S14.**  $^{19}\text{F}$  NMR spectrum of  $[\text{MeCAACH}][(\text{THF})\text{SnF}_5]$  in acetonitrile solution. The sample used for NMR measurements was crystallized from the mixture of THF and hexane in a glass vial. Because of the reaction of  $[\text{SnF}_5]^-$  with glass, signals for HF ( $-185.84$  ppm, d,  $J = 465.3$  Hz),  $[\text{SiF}_6]^{2-}$  anions ( $-137.74$  ppm), and many other side products are visible. Unfortunately, we were not able to characterize the side products.

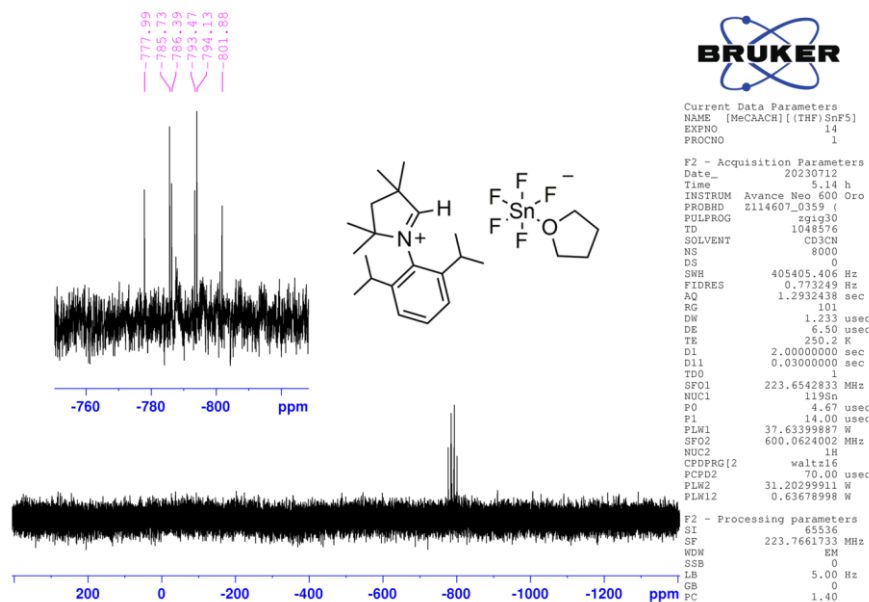

**Figure S15.**  $^{119}\text{Sn}$  NMR spectrum of  $[\text{MeCAACH}][(\text{THF})\text{SnF}_5]$  in acetonitrile solution.

# S1.5 [<sup>Me</sup>CAACH][PF<sub>6</sub>]

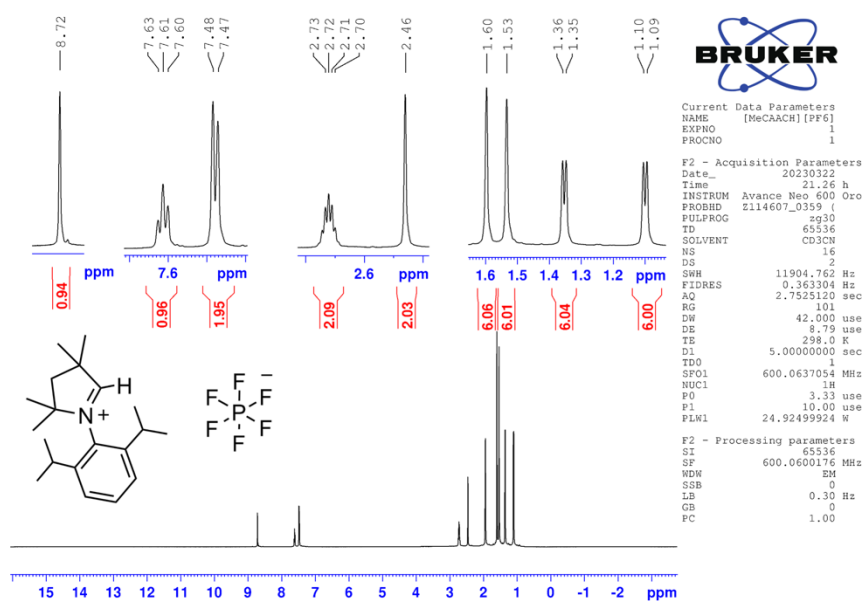

**Figure S16.** <sup>1</sup>H NMR spectrum of [<sup>Me</sup>CAACH][PF<sub>6</sub>] in acetonitrile solution.

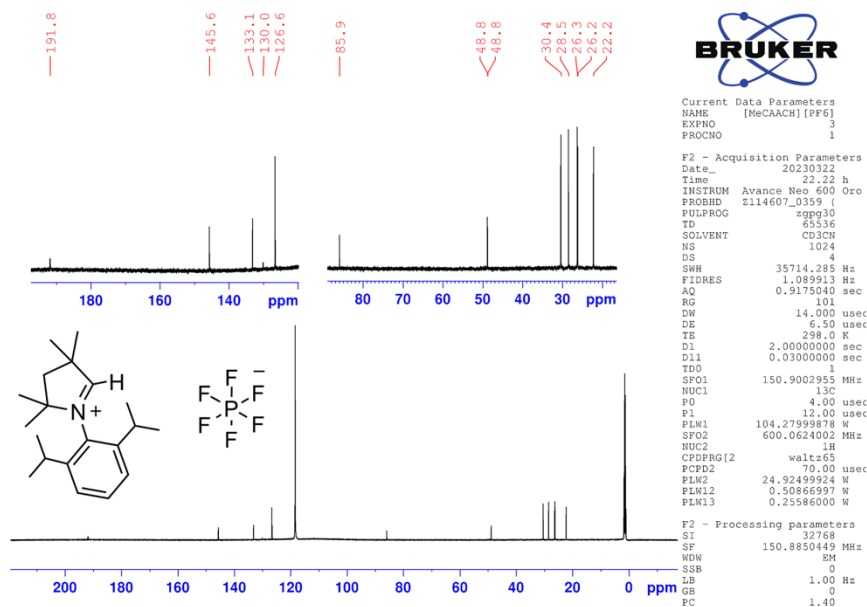

**Figure S17.** <sup>13</sup>C{<sup>1</sup>H} NMR spectrum of [<sup>Me</sup>CAACH][PF<sub>6</sub>] in acetonitrile solution.

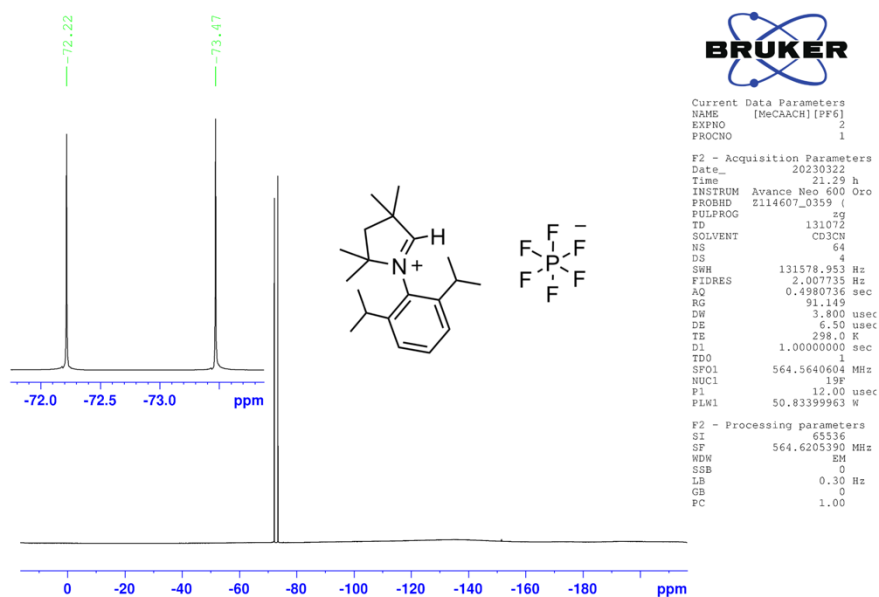

**Figure S18.**  $^{19}\text{F}$  NMR spectrum of  $[\text{MeCAACH}][\text{PF}_6]$  in acetonitrile solution.

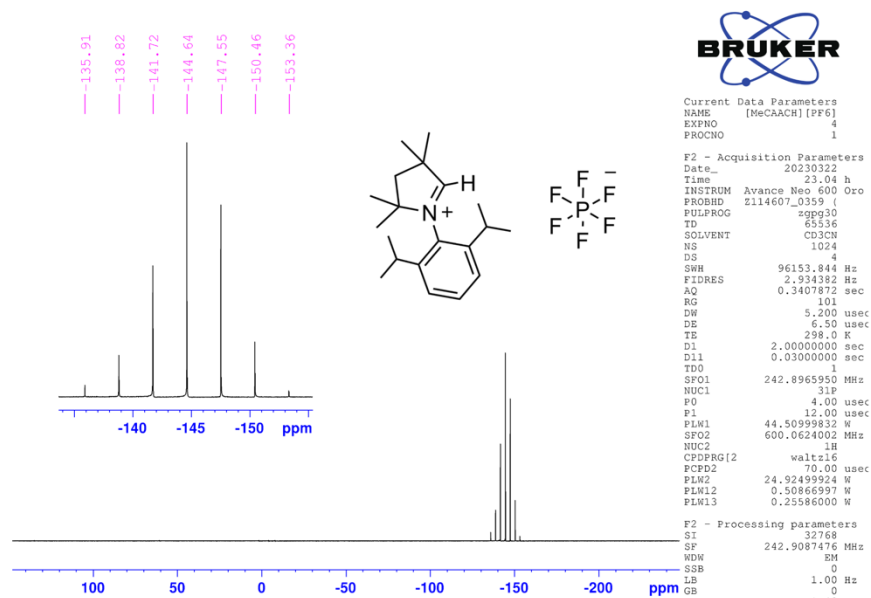

**Figure S19.**  $^{31}\text{P}$  NMR spectrum of  $[\text{MeCAACH}][\text{PF}_6]$  in acetonitrile solution.

# **S1.6 [MeCAACH][AsF<sub>6</sub>]**

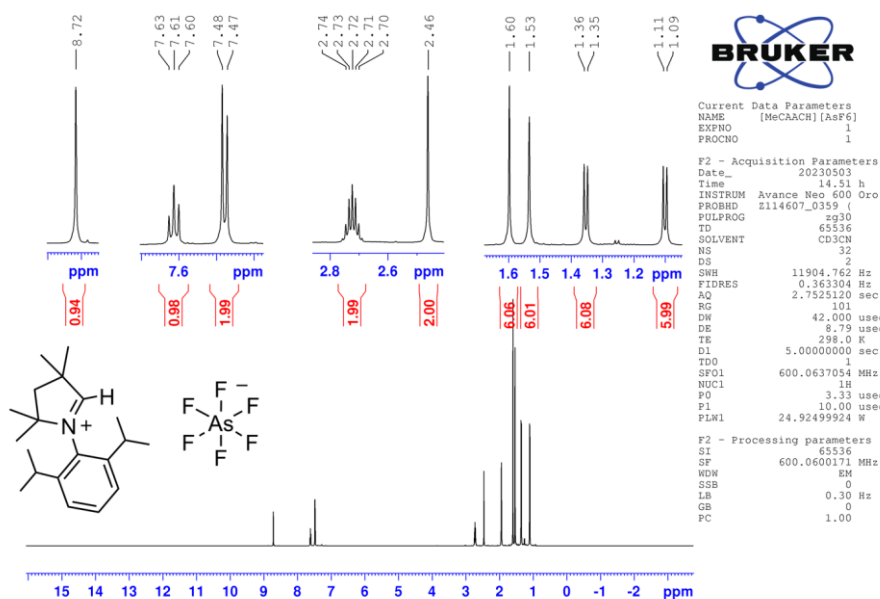

**Figure S20.** <sup>1</sup>H NMR spectrum of [MeCAACH][AsF<sub>6</sub>] in acetonitrile solution.

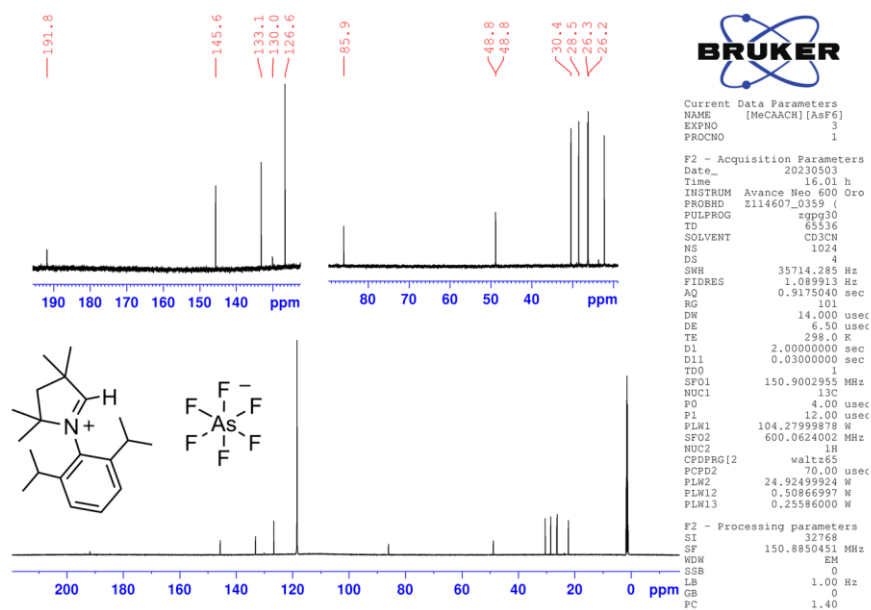

**Figure S21.** <sup>13</sup>C{<sup>1</sup>H} NMR spectrum of [MeCAACH][AsF<sub>6</sub>] in acetonitrile solution.

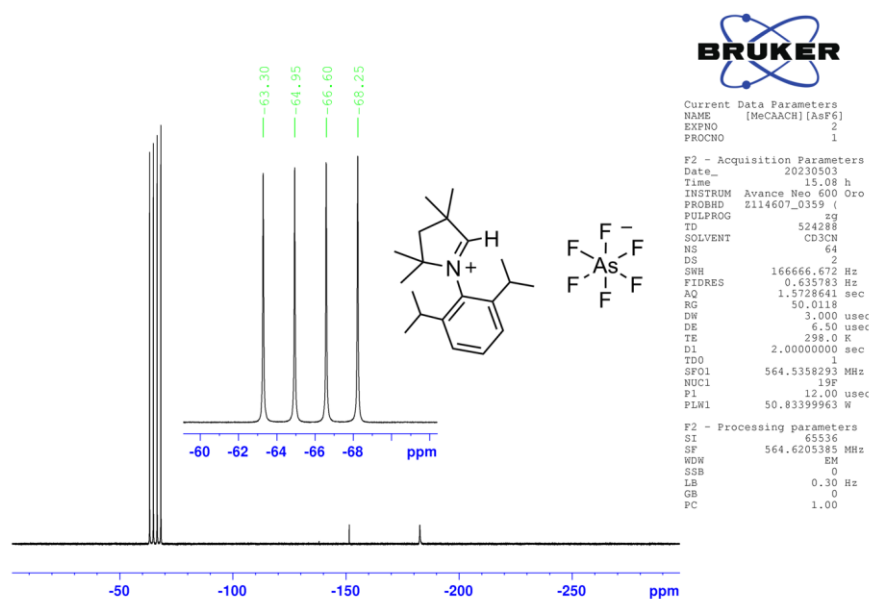

**Figure S22.**  $^{19}\text{F}$  NMR spectrum of  $[\text{MeCAACH}][\text{AsF}_6]$  in acetonitrile solution.

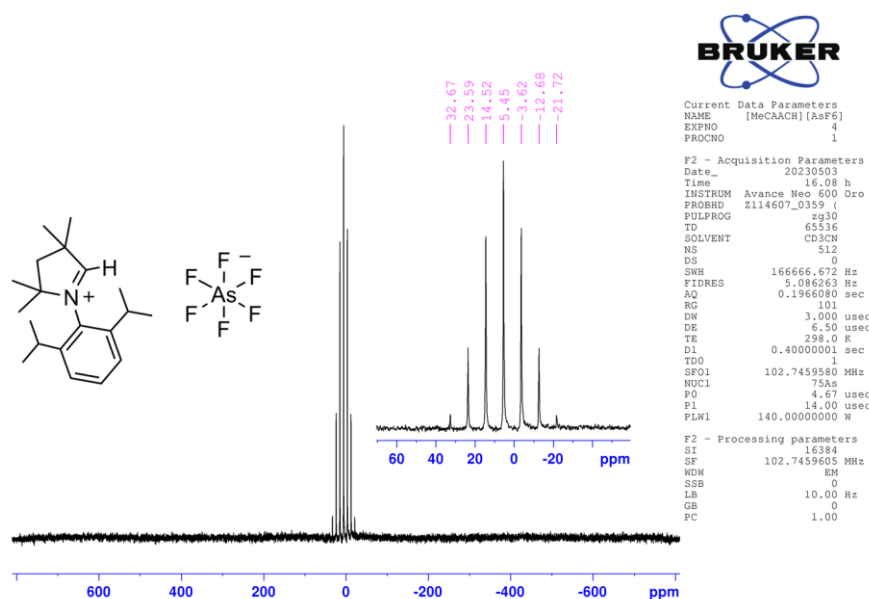

**Figure S23.**  $^{75}\text{As}$  NMR spectrum of  $[\text{MeCAACH}][\text{AsF}_6]$  in acetonitrile solution.

# **S1.7 [MeCAACH][SbF<sub>6</sub>]**

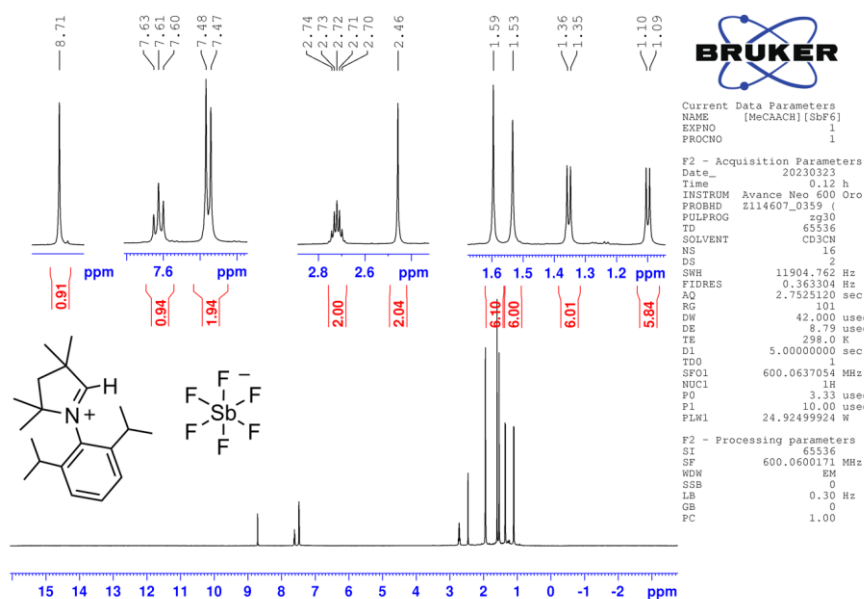

**Figure S24.** <sup>1</sup>H NMR spectrum of [MeCAACH][SbF<sub>6</sub>] in acetonitrile solution.

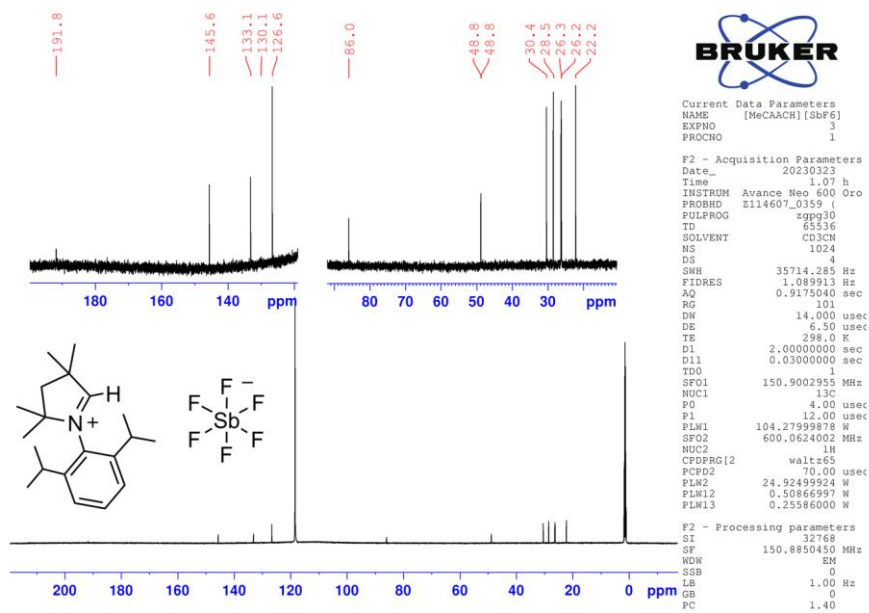

**Figure S25.** <sup>13</sup>C{<sup>1</sup>H} NMR spectrum of [MeCAACH][SbF<sub>6</sub>] in acetonitrile solution.

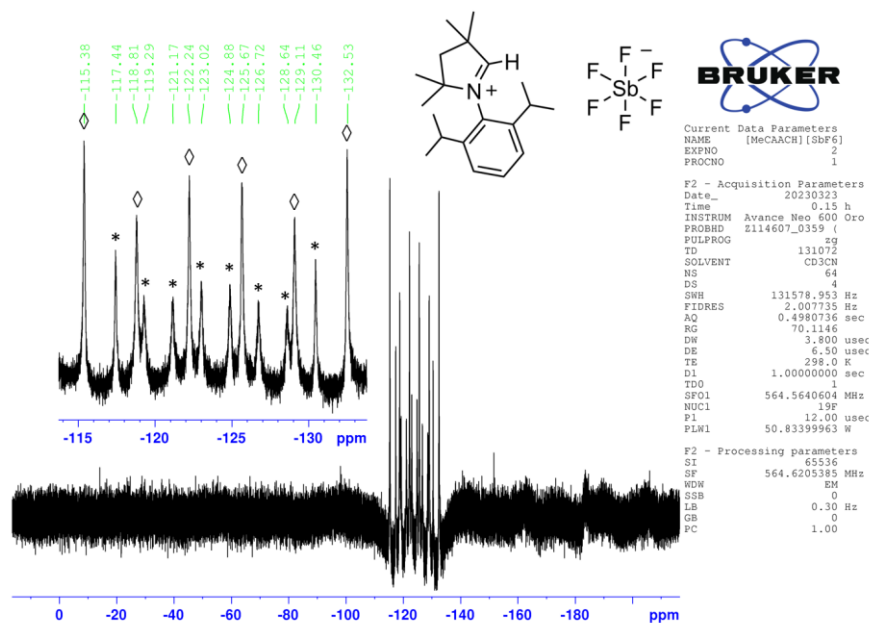

**Figure S26.**  $^{19}\text{F}$  NMR spectrum of  $[\text{MeCAACH}][\text{SbF}_6]$  in acetonitrile solution. Peaks marked with  $\diamond$  belong to anions with  $^{121}\text{Sb}$  isotope, while the peaks marked with  $*$  belong to anions with  $^{123}\text{Sb}$  isotope.

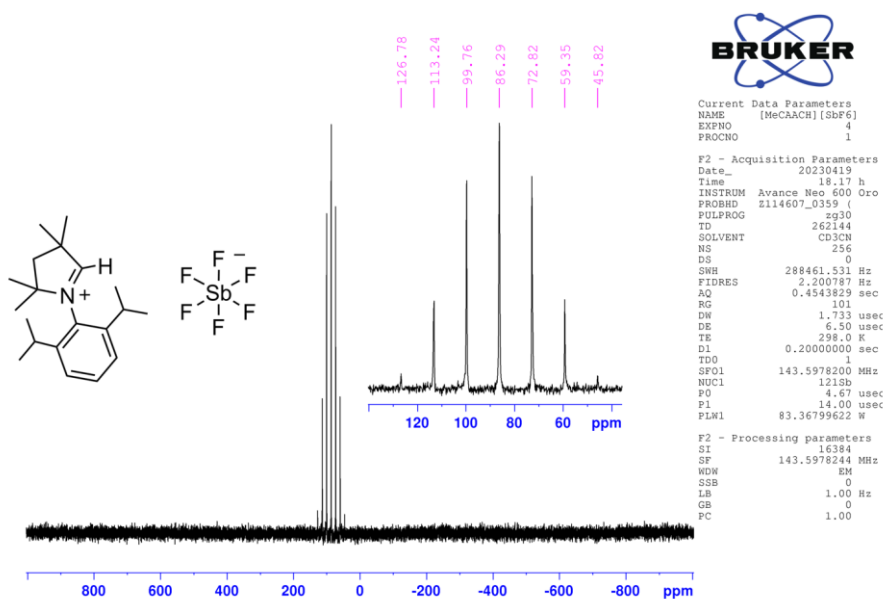

**Figure S27.**  $^{19}\text{F}$  NMR spectrum of  $[\text{MeCAACH}][\text{SbF}_6]$  in acetonitrile solution.

## S2 Raman spectroscopy

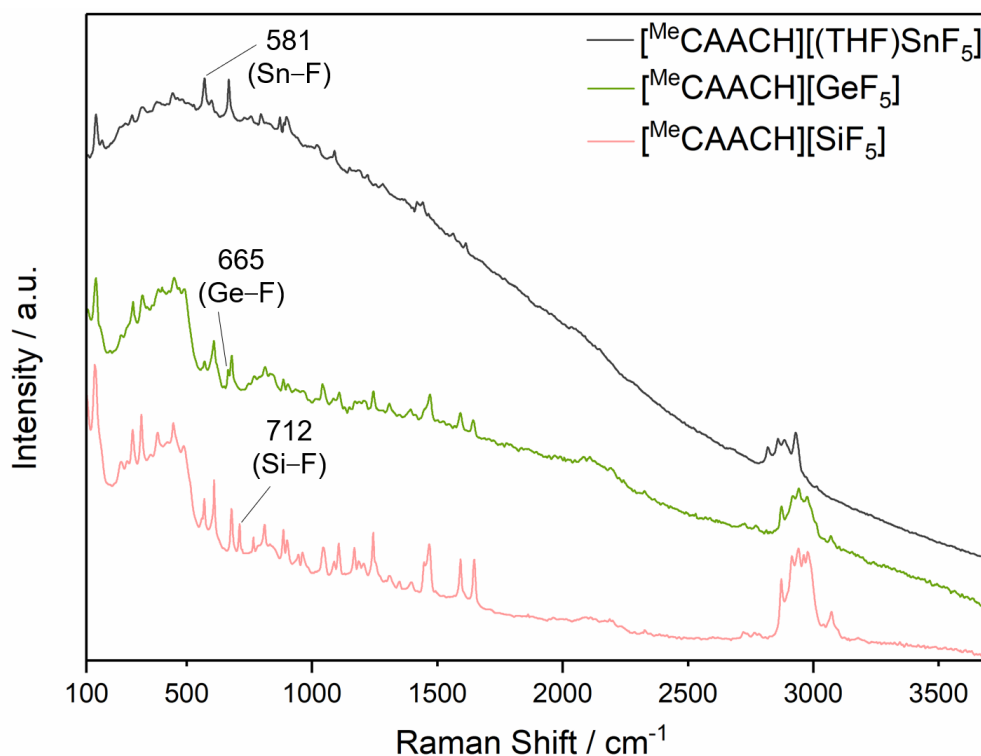

**Figure S28.** Raman spectra of [MeCAACH][SiF<sub>5</sub>], [MeCAACH][GeF<sub>5</sub>] and [MeCAACH][(THF)SnF<sub>5</sub>].

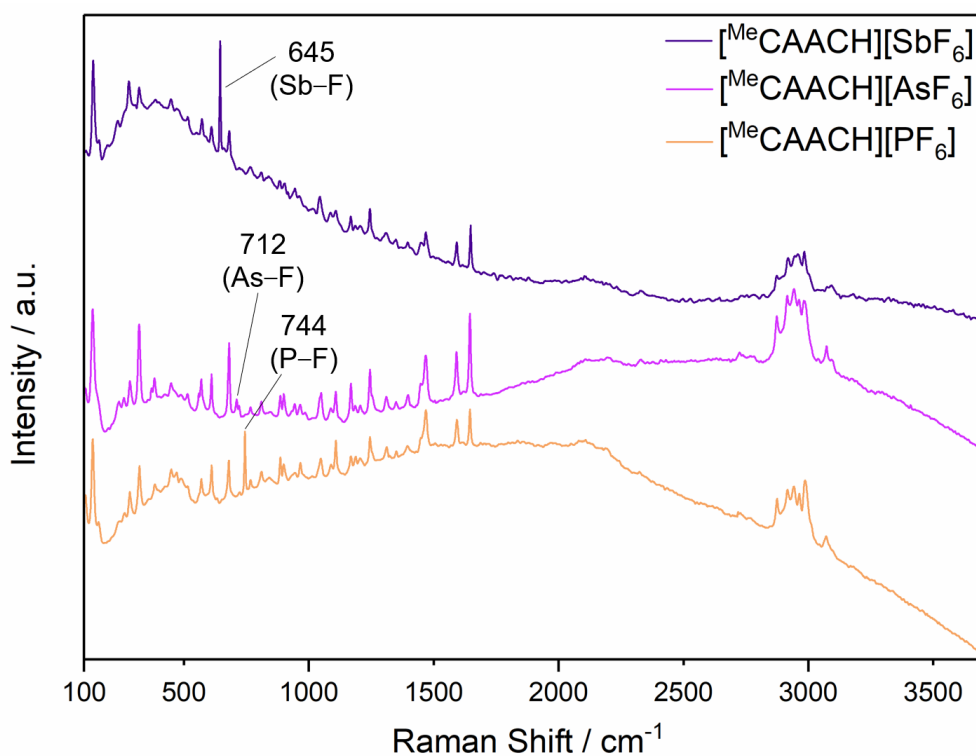

**Figure S29.** Raman spectra of [MeCAACH][PF<sub>6</sub>], [MeCAACH][AsF<sub>6</sub>] and [MeCAACH][SbF<sub>6</sub>].



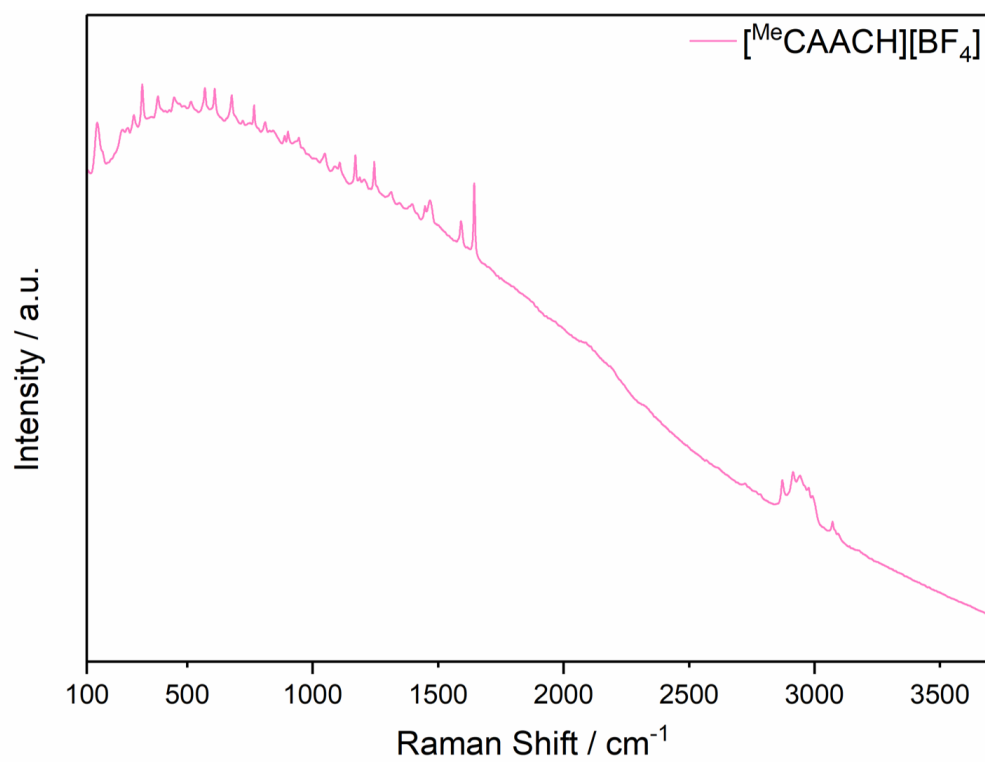

**Figure S30.** Raman spectra of  $[\text{MeCAACH}][\text{BF}_4]$ .

### S3 Crystal Structure Data

**Table S1.** Selected crystal data for [MeCAACH][SiF<sub>5</sub>], [MeCAACH][GeF<sub>5</sub>] and [MeCAACH][(THF)SnF<sub>5</sub>].

|                                                                                                           | [MeCAACH][SiF <sub>5</sub> ]                                      | [MeCAACH][GeF <sub>5</sub> ]                                      | [MeCAACH][(THF)SnF <sub>5</sub> ]                                                  |
|-----------------------------------------------------------------------------------------------------------|-------------------------------------------------------------------|-------------------------------------------------------------------|------------------------------------------------------------------------------------|
| CCDC No.                                                                                                  | 2286835                                                           | 2286836                                                           | 2286837                                                                            |
| Chemical formula                                                                                          | C <sub>20</sub> H <sub>32</sub> N·SiF <sub>5</sub>                | C <sub>20</sub> H <sub>32</sub> N·GeF <sub>5</sub>                | C <sub>20</sub> H <sub>32</sub> N·SnF <sub>5</sub> C <sub>4</sub> H <sub>8</sub> O |
| <i>F</i> <sub>w</sub> (g/mol)                                                                             | 409.55                                                            | 454.05                                                            | 572.26                                                                             |
| <i>T</i> (K)                                                                                              | 150                                                               | 150                                                               | 150                                                                                |
| <i>λ</i> (Å)                                                                                              | 1.54184                                                           | 1.54184                                                           | 1.54184                                                                            |
| Crystal size (mm)                                                                                         | 0.37 × 0.22 × 0.11                                                | 0.65 × 0.17 × 0.16                                                | 0.34 × 0.19 × 0.10                                                                 |
| Crystal system                                                                                            | Monoclinic                                                        | Monoclinic                                                        | Monoclinic                                                                         |
| Space group                                                                                               | <i>P</i> 2 <sub>1</sub> / <i>n</i>                                | <i>P</i> 2 <sub>1</sub> / <i>n</i>                                | <i>C</i> 2/ <i>c</i>                                                               |
| <i>a</i> (Å)                                                                                              | 10.7357(4)                                                        | 10.8904(1)                                                        | 33.5653(5)                                                                         |
| <i>b</i> (Å)                                                                                              | 19.1191(7)                                                        | 19.2640(2)                                                        | 9.1824(1)                                                                          |
| <i>c</i> (Å)                                                                                              | 10.8661(3)                                                        | 10.9361(2)                                                        | 16.9348(2)                                                                         |
| <i>α</i> (°)                                                                                              | 90                                                                | 90                                                                | 90                                                                                 |
| <i>β</i> (°)                                                                                              | 95.235(3)                                                         | 95.391(1)                                                         | 91.933(1)                                                                          |
| <i>γ</i> (°)                                                                                              | 90                                                                | 90                                                                | 90                                                                                 |
| <i>V</i> (Å <sup>3</sup> )                                                                                | 2221.1(1)                                                         | 2284.18(5)                                                        | 5216.5(1)                                                                          |
| <i>Z</i>                                                                                                  | 4                                                                 | 4                                                                 | 8                                                                                  |
| <i>ρ</i> <sub>calc</sub> (g/cm <sup>3</sup> )                                                             | 1.225                                                             | 1.320                                                             | 1.457                                                                              |
| <i>μ</i> (mm <sup>−1</sup> )                                                                              | 1.342                                                             | 2.219                                                             | 8.243                                                                              |
| <i>F</i> (000)                                                                                            | 872                                                               | 944                                                               | 2352                                                                               |
| <i>Θ</i> range (°)                                                                                        | 4.1–72.3                                                          | 4.0–72.3                                                          | 5.0–72.3                                                                           |
| Index ranges                                                                                              | −13 ≤ <i>h</i> ≤ 13<br>−23 ≤ <i>k</i> ≤ 23<br>−13 ≤ <i>l</i> ≤ 12 | −13 ≤ <i>h</i> ≤ 13<br>−23 ≤ <i>k</i> ≤ 23<br>−13 ≤ <i>l</i> ≤ 13 | −32 ≤ <i>h</i> ≤ 39<br>−11 ≤ <i>k</i> ≤ 11<br>−20 ≤ <i>l</i> ≤ 20                  |
| Reflections collected                                                                                     | 35176                                                             | 62624                                                             | 27893                                                                              |
| Independent reflections                                                                                   | 4372                                                              | 4493                                                              | 5085                                                                               |
| Reflections with ( <i>I</i> > 2σ( <i>I</i> ))                                                             | 3724                                                              | 3837                                                              | 4369                                                                               |
| <i>R</i> <sub>int</sub>                                                                                   | 0.0362                                                            | 0.0365                                                            | 0.0531                                                                             |
| Data / restraints / parameters                                                                            | 4372 / 0 / 298                                                    | 4493 / 0 / 298                                                    | 5085 / 0 / 297                                                                     |
| <i>S</i> <sup>[a]</sup>                                                                                   | 1.076                                                             | 1.072                                                             | 1.060                                                                              |
| <i>R</i> <sub>1</sub> <sup>[b]</sup> , <i>wR</i> <sub>2</sub> <sup>[c]</sup> ( <i>I</i> > 2σ( <i>I</i> )) | 0.0486, 0.1351                                                    | 0.0425, 0.1183                                                    | 0.0338, 0.0805                                                                     |
| <i>R</i> <sub>1</sub> <sup>[b]</sup> , <i>wR</i> <sub>2</sub> <sup>[c]</sup> (all data)                   | 0.0566, 0.1416                                                    | 0.0489, 0.1243                                                    | 0.0425, 0.0866                                                                     |
| <i>Δρ</i> <sub>min</sub> , <i>Δρ</i> <sub>max</sub> (eÅ <sup>−3</sup> )                                   | −0.348, 0.399                                                     | −0.495, 0.462                                                     | −0.526, 1.178                                                                      |

<sup>[a]</sup>  $S = [\Sigma(w(F_o^2 - F_c^2)^2)/(N_o - N_p)]^{1/2}$ .

<sup>[b]</sup>  $R_1 = ||F_o| - |F_c||/|\Sigma|F_o|$ .

<sup>[c]</sup>  $wR_2 = [\Sigma(w(F_o^2 - F_c^2)^2)/\Sigma(w(F_o^2)^2)]^{1/2}$ .

**Table S2.** Selected crystal data for [<sup>Me</sup>CAACH][(dioxane)SnF<sub>5</sub>]·dioxane, [<sup>Me</sup>CAACH][PF<sub>6</sub>] and [<sup>Me</sup>CAACH][AsF<sub>6</sub>].

|                                                                                                           | [ <sup>Me</sup> CAACH]<br>[(dioxane)SnF <sub>5</sub> ]<br>·dioxane                                                                                    | [ <sup>Me</sup> CAACH][PF <sub>6</sub> ]                          | [ <sup>Me</sup> CAACH][AsF <sub>6</sub> ]                         |
|-----------------------------------------------------------------------------------------------------------|-------------------------------------------------------------------------------------------------------------------------------------------------------|-------------------------------------------------------------------|-------------------------------------------------------------------|
| CCDC No.                                                                                                  | 2286838                                                                                                                                               | 2286839                                                           | 2286840                                                           |
| Chemical formula                                                                                          | C <sub>20</sub> H <sub>32</sub> N·<br>SnF <sub>5</sub> C <sub>4</sub> H <sub>8</sub> O <sub>2</sub> ·<br>C <sub>4</sub> H <sub>8</sub> O <sub>2</sub> | C <sub>20</sub> H <sub>32</sub> N·PF <sub>6</sub>                 | C <sub>20</sub> H <sub>32</sub> N·AsF <sub>6</sub>                |
| <i>F</i> <sub>w</sub> (g/mol)                                                                             | 676.36                                                                                                                                                | 431.43                                                            | 475.38                                                            |
| <i>T</i> (K)                                                                                              | 150                                                                                                                                                   | 150                                                               | 150                                                               |
| <i>λ</i> (Å)                                                                                              | 0.71073                                                                                                                                               | 1.54184                                                           | 1.54184                                                           |
| Cristal size (mm)                                                                                         | 0.83 × 0.40 × 0.26                                                                                                                                    | 0.42 × 0.27 × 0.17                                                | 0.36 × 0.28 × 0.25                                                |
| Crystal system                                                                                            | Triclinic                                                                                                                                             | Orthorhombic                                                      | Orthorhombic                                                      |
| Space group                                                                                               | <i>P</i> −1                                                                                                                                           | <i>Pbca</i>                                                       | <i>Pbca</i>                                                       |
| <i>a</i> (Å)                                                                                              | 11.1300(7)                                                                                                                                            | 15.3045(2)                                                        | 15.5001(2)                                                        |
| <i>b</i> (Å)                                                                                              | 11.7060(6)                                                                                                                                            | 14.9307(2)                                                        | 14.9287(2)                                                        |
| <i>c</i> (Å)                                                                                              | 13.3771(9)                                                                                                                                            | 19.9003(3)                                                        | 20.0389(2)                                                        |
| <i>α</i> (°)                                                                                              | 74.625(5)                                                                                                                                             | 90                                                                | 90                                                                |
| <i>β</i> (°)                                                                                              | 68.223(6)                                                                                                                                             | 90                                                                | 90                                                                |
| <i>γ</i> (°)                                                                                              | 82.213(5)                                                                                                                                             | 90                                                                | 90                                                                |
| <i>V</i> (Å <sup>3</sup> )                                                                                | 1559.2(2)                                                                                                                                             | 4547.4(1)                                                         | 4636.9(1)                                                         |
| <i>Z</i>                                                                                                  | 2                                                                                                                                                     | 8                                                                 | 8                                                                 |
| <i>ρ</i> <sub>calc</sub> (g/cm <sup>3</sup> )                                                             | 1.441                                                                                                                                                 | 1.260                                                             | 1.362                                                             |
| <i>μ</i> (mm <sup>−1</sup> )                                                                              | 0.881                                                                                                                                                 | 1.559                                                             | 2.462                                                             |
| <i>F</i> (000)                                                                                            | 700                                                                                                                                                   | 1824                                                              | 1968                                                              |
| <i>θ</i> range (°)                                                                                        | 3.0–28.8                                                                                                                                              | 3.6–72.5                                                          | 2.8–72.3                                                          |
| Index ranges                                                                                              | −14 ≤ <i>h</i> ≤ 15<br>−15 ≤ <i>k</i> ≤ 15<br>−17 ≤ <i>l</i> ≤ 17                                                                                     | −12 ≤ <i>h</i> ≤ 18<br>−16 ≤ <i>k</i> ≤ 18<br>−24 ≤ <i>l</i> ≤ 17 | −19 ≤ <i>h</i> ≤ 18<br>−18 ≤ <i>k</i> ≤ 12<br>−24 ≤ <i>l</i> ≤ 23 |
| Reflections collected                                                                                     | 17737                                                                                                                                                 | 17688                                                             | 36394                                                             |
| Independent reflections                                                                                   | 6662                                                                                                                                                  | 4414                                                              | 4573                                                              |
| Reflections with ( <i>I</i> > 2σ( <i>I</i> ))                                                             | 5610                                                                                                                                                  | 3964                                                              | 3807                                                              |
| <i>R</i> <sub>int</sub>                                                                                   | 0.0429                                                                                                                                                | 0.0200                                                            | 0.0360                                                            |
| Data / restrains / parameters                                                                             | 6662 / 0 / 360                                                                                                                                        | 4414 / 0 / 261                                                    | 4573 / 0 / 261                                                    |
| <i>S</i> <sup>[a]</sup>                                                                                   | 1.066                                                                                                                                                 | 1.050                                                             | 1.044                                                             |
| <i>R</i> <sub>1</sub> <sup>[b]</sup> , <i>wR</i> <sub>2</sub> <sup>[c]</sup> ( <i>I</i> > 2σ( <i>I</i> )) | 0.0388, 0.0865                                                                                                                                        | 0.0406, 0.1125                                                    | 0.0350, 0.0958                                                    |
| <i>R</i> <sub>1</sub> <sup>[b]</sup> , <i>wR</i> <sub>2</sub> <sup>[c]</sup> (all data)                   | 0.0522, 0.0962                                                                                                                                        | 0.0448, 0.1169                                                    | 0.0431, 0.1035                                                    |
| <i>Δρ</i> <sub>min</sub> , <i>Δρ</i> <sub>max</sub> (eÅ <sup>−3</sup> )                                   | −0.979, 0.720                                                                                                                                         | −0.372, 0.319                                                     | −0.573, 0.371                                                     |

<sup>[a]</sup>  $S = [\Sigma(w(F_o^2 - F_c^2)^2)/(N_o - N_p)]^{1/2}$ .

<sup>[b]</sup>  $R_1 = ||F_o| - |F_c||/|\Sigma|F_o|$ .

<sup>[c]</sup>  $wR_2 = [\Sigma(w(F_o^2 - F_c^2)^2)/\Sigma(w(F_o^2)^2)]^{1/2}$ .

**Table S3.** Selected crystal data for [<sup>Me</sup>CAACH][BF<sub>4</sub>], [<sup>Me</sup>CAACH][Cl] and [<sup>Me</sup>CAACH][OTf].

|                                                                                                           | [ <sup>Me</sup> CAACH][BF <sub>4</sub> ]                          | [ <sup>Me</sup> CAACH][Cl]                                       | [ <sup>Me</sup> CAACH][OTf]                                       |
|-----------------------------------------------------------------------------------------------------------|-------------------------------------------------------------------|------------------------------------------------------------------|-------------------------------------------------------------------|
| CCDC No.                                                                                                  | 2286841                                                           | 2286842                                                          | 2286843                                                           |
| Chemical formula                                                                                          | C <sub>20</sub> H <sub>32</sub> N·BF <sub>4</sub>                 | C <sub>20</sub> H <sub>32</sub> N·Cl                             | C <sub>20</sub> H <sub>32</sub> N·CF <sub>3</sub> SO <sub>3</sub> |
| <i>F</i> <sub>w</sub> (g/mol)                                                                             | 373.27                                                            | 321.91                                                           | 435.53                                                            |
| <i>T</i> (K)                                                                                              | 150                                                               | 150                                                              | 150                                                               |
| <i>λ</i> (Å)                                                                                              | 1.54184                                                           | 1.54184                                                          | 1.54184                                                           |
| Cristal size (mm)                                                                                         | 0.57 × 0.25 × 0.20                                                | 0.40 × 0.13 × 0.06                                               | 0.51 × 0.37 × 0.15                                                |
| Crystal system                                                                                            | Monoclinic                                                        | Monoclinic                                                       | Monoclinic                                                        |
| Space group                                                                                               | <i>P</i> 2 <sub>1</sub> / <i>n</i>                                | <i>P</i> 2 <sub>1</sub> / <i>c</i>                               | <i>P</i> 2 <sub>1</sub> / <i>n</i>                                |
| <i>a</i> (Å)                                                                                              | 10.2499(3)                                                        | 9.4602(3)                                                        | 10.6790(1)                                                        |
| <i>b</i> (Å)                                                                                              | 19.4915(4)                                                        | 9.8694(3)                                                        | 16.0118(2)                                                        |
| <i>c</i> (Å)                                                                                              | 10.6119(2)                                                        | 20.8442(6)                                                       | 27.0646(3)                                                        |
| <i>α</i> (°)                                                                                              | 90                                                                | 90                                                               | 90                                                                |
| <i>β</i> (°)                                                                                              | 91.377(2)                                                         | 95.676(3)                                                        | 97.927(1)                                                         |
| <i>γ</i> (°)                                                                                              | 90                                                                | 90                                                               | 90                                                                |
| <i>V</i> (Å <sup>3</sup> )                                                                                | 2119.50(8)                                                        | 1936.6(1)                                                        | 4583.6(1)                                                         |
| <i>Z</i>                                                                                                  | 4                                                                 | 4                                                                | 8                                                                 |
| <i>ρ</i> <sub>calc</sub> (g/cm <sup>3</sup> )                                                             | 1.170                                                             | 1.104                                                            | 1.262                                                             |
| <i>μ</i> (mm <sup>−1</sup> )                                                                              | 0.760                                                             | 1.700                                                            | 1.651                                                             |
| <i>F</i> (000)                                                                                            | 800                                                               | 704                                                              | 1856                                                              |
| <i>θ</i> range (°)                                                                                        | 4.1–72.2                                                          | 4.2–72.0                                                         | 3.2–72.3                                                          |
| Index ranges                                                                                              | −12 ≤ <i>h</i> ≤ 11<br>−23 ≤ <i>k</i> ≤ 23<br>−13 ≤ <i>l</i> ≤ 13 | −11 ≤ <i>h</i> ≤ 10<br>−7 ≤ <i>k</i> ≤ 11<br>−17 ≤ <i>l</i> ≤ 25 | −11 ≤ <i>h</i> ≤ 12<br>−19 ≤ <i>k</i> ≤ 19<br>−28 ≤ <i>l</i> ≤ 33 |
| Reflections collected                                                                                     | 5494                                                              | 7696                                                             | 36202                                                             |
| Independent reflections                                                                                   | 5494                                                              | 3727                                                             | 8877                                                              |
| Reflections with ( <i>I</i> > 2σ( <i>I</i> ))                                                             | 4471                                                              | 2937                                                             | 7741                                                              |
| <i>R</i> <sub>int</sub>                                                                                   | na                                                                | 0.0288                                                           | 0.0353                                                            |
| Data / restrains / parameters                                                                             | 5494 / 24 / 295                                                   | 3727 / 0 / 207                                                   | 8877 / 0 / 539                                                    |
| <i>S</i> <sup>[a]</sup>                                                                                   | 1.067                                                             | 1.019                                                            | 1.106                                                             |
| <i>R</i> <sub>1</sub> <sup>[b]</sup> , <i>wR</i> <sub>2</sub> <sup>[c]</sup> ( <i>I</i> > 2σ( <i>I</i> )) | 0.0571, 0.1562                                                    | 0.0466, 0.1128                                                   | 0.0477, 0.1194                                                    |
| <i>R</i> <sub>1</sub> <sup>[b]</sup> , <i>wR</i> <sub>2</sub> <sup>[c]</sup> (all data)                   | 0.0696, 0.1671                                                    | 0.0635, 0.1244                                                   | 0.0550, 0.1238                                                    |
| <i>Δρ</i> <sub>min</sub> , <i>Δρ</i> <sub>max</sub> (eÅ <sup>−3</sup> )                                   | −0.179, 0.320                                                     | −0.191, 0.535                                                    | −0.327, 0.413                                                     |

<sup>[a]</sup>  $S = [\Sigma(w(F_o^2 - F_c^2)^2)/(N_o - N_p)]^{1/2}$ .

<sup>[b]</sup>  $R_1 = ||F_o| - |F_c||/\Sigma|F_o|$ .

<sup>[c]</sup>  $wR_2 = [\Sigma(w(F_o^2 - F_c^2)^2)/\Sigma(w(F_o^2)^2)]^{1/2}$ .

**Table S4.** Selected bond lengths (Å) and bond angles (°) for [<sup>Me</sup>CAACH][SiF<sub>5</sub>], [<sup>Me</sup>CAACH][GeF<sub>5</sub>] and [<sup>Me</sup>CAACH][(THF)SnF<sub>5</sub>].

|                                                |           |             |           |             |          |
|------------------------------------------------|-----------|-------------|-----------|-------------|----------|
| [ <sup>Me</sup> CAACH][SiF <sub>5</sub> ]      |           |             |           |             |          |
| <i>Bond lengths</i>                            |           |             |           |             |          |
| Si1–F1A                                        | 1.641(6)  | Si1–F3A     | 1.571(4)  | Si1–F5A     | 1.593(5) |
| Si1–F1B                                        | 1.64(2)   | Si1–F3B     | 1.63(1)   | Si1–F5B     | 1.55(2)  |
| Si1–F2A                                        | 1.639(7)  | Si1–F4A     | 1.619(4)  | N1–C2       | 1.272(2) |
| Si1–F2B                                        | 1.60(2)   | Si1–F4B     | 1.41(2)   | C2–C3       | 1.486(3) |
| <i>Bond angles</i>                             |           |             |           |             |          |
| F2A–Si1–F1A                                    | 176.6(6)  | F3B–Si1–F1B | 111(2)    | F5A–Si1–F1A | 88.8(3)  |
| F2B–Si1–F1B                                    | 160(2)    | F4A–Si1–F1A | 93.5(4)   | F5A–Si1–F2A | 92.1(4)  |
| F2B–Si1–F3B                                    | 89(1)     | F4A–Si1–F2A | 88.8(3)   | F5A–Si1–F4A | 123.5(3) |
| F3A–Si1–F1A                                    | 84.2(6)   | F4B–Si1–F1B | 78(2)     | F5B–Si1–F1B | 86(1)    |
| F3A–Si1–F2A                                    | 92.5(4)   | F4B–Si1–F2B | 95(1)     | F5B–Si1–F2B | 84(1)    |
| F3A–Si1–F4A                                    | 115.0(3)  | F4B–Si1–F3B | 121(1)    | F5B–Si1–F3B | 111(1)   |
| F3A–Si1–F5A                                    | 121.3(3)  | F4B–Si1–F5B | 128(2)    | N1–C2–C3    | 114.8(2) |
|                                                |           |             |           |             |          |
| [ <sup>Me</sup> CAACH][GeF <sub>5</sub> ]      |           |             |           |             |          |
| <i>Bond lengths</i>                            |           |             |           |             |          |
| Ge1–F1A                                        | 1.734(9)  | Ge1–F3A     | 1.697(4)  | Ge1–F5A     | 1.73(1)  |
| Ge1–F1B                                        | 1.68(1)   | Ge1–F3B     | 1.67(1)   | Ge1–F5B     | 1.63(2)  |
| Ge1–F2A                                        | 1.731(7)  | Ge1–F4A     | 1.651(5)  | N1–C2       | 1.267(3) |
| Ge1–F2B                                        | 1.68(1)   | Ge1–F4B     | 1.80(1)   | C2–C3       | 1.489(3) |
| <i>Bond angles</i>                             |           |             |           |             |          |
| F1B–Ge1–F4B                                    | 92(1)     | F3B–Ge1–F1B | 87.8(8)   | F5A–Ge1–F1A | 87.3(5)  |
| F2A–Ge1–F1A                                    | 174.3(5)  | F3B–Ge1–F2B | 92(1)     | F5A–Ge1–F2A | 91.1(5)  |
| F2B–Ge1–F1B                                    | 176(1)    | F3B–Ge1–F4B | 104(1)    | F5B–Ge1–F1B | 93(1)    |
| F2B–Ge1–F4B                                    | 92.4(8)   | F4A–Ge1–F1A | 89.9(5)   | F5B–Ge1–F2B | 85(1)    |
| F3A–Ge1–F1A                                    | 88.3(5)   | F4A–Ge1–F2A | 95.6(5)   | F5B–Ge1–F3B | 145(1)   |
| F3A–Ge1–F2A                                    | 88.3(3)   | F4A–Ge1–F3A | 114.7(3)  | F5B–Ge1–F4B | 110(1)   |
| F3A–Ge1–F5A                                    | 126.0(5)  | F4A–Ge1–F5A | 119.0(5)  | N1–C2–C3    | 115.1(2) |
|                                                |           |             |           |             |          |
| [ <sup>Me</sup> CAACH][(THF)SnF <sub>5</sub> ] |           |             |           |             |          |
| <i>Bond lengths</i>                            |           |             |           |             |          |
| Sn1–F1                                         | 1.945(2)  | Sn1–F5      | 1.952(2)  | C3–C4       | 1.511(6) |
| Sn1–O1                                         | 2.167(2)  | O1–C1       | 1.452(4)  | N11–C12     | 1.280(4) |
| Sn1–F2                                         | 1.937(2)  | O1–C4       | 1.461(4)  | C12–C13     | 1.485(4) |
| Sn1–F3                                         | 1.945(2)  | C1–C2       | 1.501(6)  |             |          |
| Sn1–F4                                         | 1.940(2)  | C2–C3       | 1.518(7)  |             |          |
| <i>Bond angles</i>                             |           |             |           |             |          |
| F1–Sn1–O1                                      | 177.61(9) | F3–Sn1–O1   | 86.0(1)   | C1–O1–C4    | 110.8(3) |
| F1–Sn1–F3                                      | 92.7(1)   | F3–Sn1–F5   | 171.87(9) | C4–O1–Sn1   | 125.3(2) |
| F1–Sn1–F5                                      | 95.38(9)  | F4–Sn1–F1   | 96.0(1)   | O1–C1–C2    | 104.5(3) |
| F2–Sn1–F1                                      | 93.08(9)  | F4–Sn1–O1   | 86.1(1)   | C1–C2–C3    | 103.0(4) |
| F2–Sn1–O1                                      | 84.86(9)  | F4–Sn1–F3   | 90.4(1)   | C4–C3–C2    | 102.7(3) |
| F2–Sn1–F3                                      | 89.1(1)   | F4–Sn1–F5   | 88.2(1)   | O1–C4–C3    | 103.8(3) |
| F2–Sn1–F4                                      | 170.90(9) | F5–Sn1–O1   | 85.88(9)  | N11–C12–C13 | 114.3(3) |
| F2–Sn1–F5                                      | 91.06(9)  | C1–O1–Sn1   | 123.3(2)  |             |          |

**Table S5.** Selected bond lengths (Å) and bond angles (°) for [MeCAACH][(dioxane)SnF<sub>5</sub>]·dioxane, [MeCAACH][PF<sub>6</sub>] and [MeCAACH][AsF<sub>6</sub>].

| [MeCAACH][(dioxane)SnF <sub>5</sub> ]·dioxane |           |           |           |             |           |
|-----------------------------------------------|-----------|-----------|-----------|-------------|-----------|
| <i>Bond lengths</i>                           |           |           |           |             |           |
| Sn1–F1                                        | 1.925(2)  | Sn1–F5    | 1.941(2)  | O2–C3       | 1.412(4)  |
| Sn1–O1                                        | 2.177(2)  | O1–C1     | 1.444(4)  | C3–C4       | 1.483(5)  |
| Sn1–F2                                        | 1.926(2)  | O1–C4     | 1.458(4)  | N11–C12     | 1.276(4)  |
| Sn1–F3                                        | 1.931(2)  | C1–C2     | 1.477(6)  | C12–C13     | 1.482(4)  |
| Sn1–F4                                        | 1.935(2)  | O2–C2     | 1.426(4)  |             |           |
| <i>Bond angles</i>                            |           |           |           |             |           |
| F1–Sn1–O1                                     | 85.64(9)  | F2–Sn1–F5 | 172.90(9) | C1–O1–C4    | 109.6(3)  |
| F1–Sn1–F2                                     | 90.9(1)   | F3–Sn1–O1 | 178.62(9) | C4–O1–Sn1   | 123.3(2)  |
| F1–Sn1–F3                                     | 94.48(9)  | F3–Sn1–F4 | 95.93(8)  | O1–C1–C2    | 108.4(3)  |
| F1–Sn1–F4                                     | 169.59(8) | F3–Sn1–F5 | 94.84(9)  | C3–O2–C2    | 108.9(3)  |
| F1–Sn1–F5                                     | 88.98(9)  | F4–Sn1–O1 | 83.96(8)  | O2–C2–C1    | 111.2(4)  |
| F2–Sn1–O1                                     | 86.4(1)   | F4–Sn1–F5 | 90.00(8)  | O2–C3–C4    | 111.4(3)  |
| F2–Sn1–F3                                     | 92.25(9)  | F5–Sn1–O1 | 86.5(1)   | O1–C4–C3    | 109.0(3)  |
| F2–Sn1–F4                                     | 88.87(9)  | C1–O1–Sn1 | 124.2(2)  | N11–C12–C13 | 114.5(3)  |
|                                               |           |           |           |             |           |
| [MeCAACH][PF <sub>6</sub> ]                   |           |           |           |             |           |
| <i>Bond lengths</i>                           |           |           |           |             |           |
| P1–F1                                         | 1.585(1)  | P1–F4     | 1.597(1)  | N1–C2       | 1.274(2)  |
| P1–F2                                         | 1.600(1)  | P1–F5     | 1.588(1)  | C2–C3       | 1.490(2)  |
| P1–F3                                         | 1.583(1)  | P1–F6     | 1.594(1)  |             |           |
| <i>Bond angles</i>                            |           |           |           |             |           |
| F1–P1–F2                                      | 179.02(8) | F3–P1–F4  | 88.81(6)  | F5–P1–F6    | 89.49(8)  |
| F1–P1–F4                                      | 90.24(7)  | F3–P1–F5  | 178.92(8) | F6–P1–F2    | 89.67(7)  |
| F1–P1–F5                                      | 90.24(8)  | F3–P1–F6  | 91.38(8)  | F6–P1–F4    | 178.99(7) |
| F1–P1–F6                                      | 90.75(7)  | F4–P1–F2  | 89.34(6)  | N1–C2–C3    | 114.7(1)  |
| F3–P1–F1                                      | 90.38(8)  | F5–P1–F2  | 88.88(8)  |             |           |
| F3–P1–F2                                      | 90.49(8)  | F5–P1–F4  | 90.30(7)  |             |           |
|                                               |           |           |           |             |           |
| [MeCAACH][AsF <sub>6</sub> ]                  |           |           |           |             |           |
| <i>Bond lengths</i>                           |           |           |           |             |           |
| As1–F1                                        | 1.703(2)  | As1–F4    | 1.708(2)  | N1–C2       | 1.273(3)  |
| As1–F2                                        | 1.708(2)  | As1–F5    | 1.714(2)  | C2–C3       | 1.491(3)  |
| As1–F3                                        | 1.708(2)  | As1–F6    | 1.719(2)  |             |           |
| <i>Bond angles</i>                            |           |           |           |             |           |
| F1–As1–F2                                     | 89.8(1)   | F2–As1–F4 | 90.4(1)   | F4–As1–F5   | 90.10(9)  |
| F1–As1–F3                                     | 91.8(1)   | F2–As1–F5 | 90.32(9)  | F4–As1–F6   | 89.15(9)  |
| F1–As1–F4                                     | 178.58(9) | F2–As1–F6 | 179.6(1)  | F5–As1–F6   | 89.53(8)  |
| F1–As1–F5                                     | 88.50(8)  | F3–As1–F4 | 89.6(1)   | N1–C2–C3    | 114.7(2)  |
| F1–As1–F6                                     | 90.6(1)   | F3–As1–F5 | 178.97(8) |             |           |
| F2–As1–F3                                     | 90.66(9)  | F3–As1–F6 | 89.49(8)  |             |           |

**Table S6.** Selected bond lengths (Å) and bond angles (°) for [MeCAACH][BF<sub>4</sub>], [MeCAACH][Cl] and [MeCAACH][OTf].

|                             |          |            |          |                    |          |
|-----------------------------|----------|------------|----------|--------------------|----------|
| [MeCAACH][BF <sub>4</sub> ] |          |            |          |                    |          |
| <i>Bond lengths</i>         |          |            |          |                    |          |
| B1–F1A                      | 1.405(6) | B1–F3A     | 1.344(4) | N1–C2              | 1.272(3) |
| B1–F1B                      | 1.33(2)  | B1–F3B     | 1.26(2)  | C2–C3              | 1.487(3) |
| B1–F2A                      | 1.337(6) | B1–F4A     | 1.385(5) |                    |          |
| B1–F2B                      | 1.32(1)  | B1–F4B     | 1.27(2)  |                    |          |
| <i>Bond angles</i>          |          |            |          |                    |          |
| F1A–B1–F2A                  | 107.5(4) | F1B–B1–F4B | 115(1)   | F3A–B1–F4A         | 106.4(3) |
| F1B–B1–F2B                  | 112(1)   | F2A–B1–F3A | 112.5(5) | F3B–B1–F4B         | 117(2)   |
| F1A–B1–F3A                  | 110.3(4) | F2B–B1–F3B | 100(1)   | N1–C2–C3           | 114.9(2) |
| F1B–B1–F3B                  | 105(1)   | F2A–B1–F4A | 111.6(4) |                    |          |
| F1A–B1–F4A                  | 108.5(3) | F2B–B1–F4B | 107(1)   |                    |          |
|                             |          |            |          |                    |          |
| [MeCAACH][Cl]               |          |            |          |                    |          |
| <i>Bond lengths</i>         |          |            |          | <i>Bond angles</i> |          |
| N1–C2                       | 1.276(2) | C2–C3      | 1.489(3) | N1–C2–C3           | 113.8(2) |
|                             |          |            |          |                    |          |
| [MeCAACH][OTf]              |          |            |          |                    |          |
| <i>Ion Pair 1</i>           |          |            |          |                    |          |
| <i>Bond lengths</i>         |          |            |          |                    |          |
| S1–O1                       | 1.438(2) | S1–C22     | 1.830(2) | C22–F3             | 1.334(3) |
| S1–O2                       | 1.431(2) | C22–F1     | 1.317(3) | N1–C2              | 1.274(3) |
| S1–O3                       | 1.434(2) | C22–F2     | 1.325(3) | C2–C3              | 1.488(3) |
| <i>Bond angles</i>          |          |            |          |                    |          |
| O1–S1–C22                   | 103.0(1) | O3–S1–C22  | 103.6(1) | F2–C22–F3          | 107.1(2) |
| O2–S1–O1                    | 115.2(1) | F1–C22–S1  | 112.4(2) | F3–C22–S1          | 110.9(2) |
| O2–S1–O3                    | 115.3(1) | F1–C22–F2  | 107.3(2) | N1–C2–C3           | 114.7(2) |
| O2–S1–C22                   | 102.6(1) | F1–C22–F3  | 107.4(2) |                    |          |
| O3–S1–O1                    | 114.6(1) | F2–C22–S1  | 111.5(2) |                    |          |
| <i>Ion Pair 2</i>           |          |            |          |                    |          |
| <i>Bond lengths</i>         |          |            |          |                    |          |
| S2–O4                       | 1.432(2) | S2–C52     | 1.826(2) | C52–F6             | 1.328(3) |
| S2–O5                       | 1.437(2) | C52–F4     | 1.325(3) | N31–C32            | 1.274(3) |
| S2–O6                       | 1.440(2) | C52–F5     | 1.327(3) | C32–C33            | 1.492(3) |
| <i>Bond angles</i>          |          |            |          |                    |          |
| O4–S2–O5                    | 115.1(1) | O6–S2–C52  | 102.9(1) | F5–C52–F6          | 106.8(2) |
| O4–S2–O6                    | 115.7(1) | F4–C52–S2  | 110.7(2) | F6–C52–S2          | 111.5(2) |
| O4–S2–C52                   | 103.5(1) | F4–C52–F5  | 107.3(2) | N31–C32–C33        | 114.3(2) |
| O5–S2–O6                    | 117.0(1) | F4–C52–F6  | 108.6(2) |                    |          |
| O5–S2–C52                   | 103.2(1) | F5–C52–S2  | 111.7(2) |                    |          |

### S3.1 Crystal structures of selected compounds

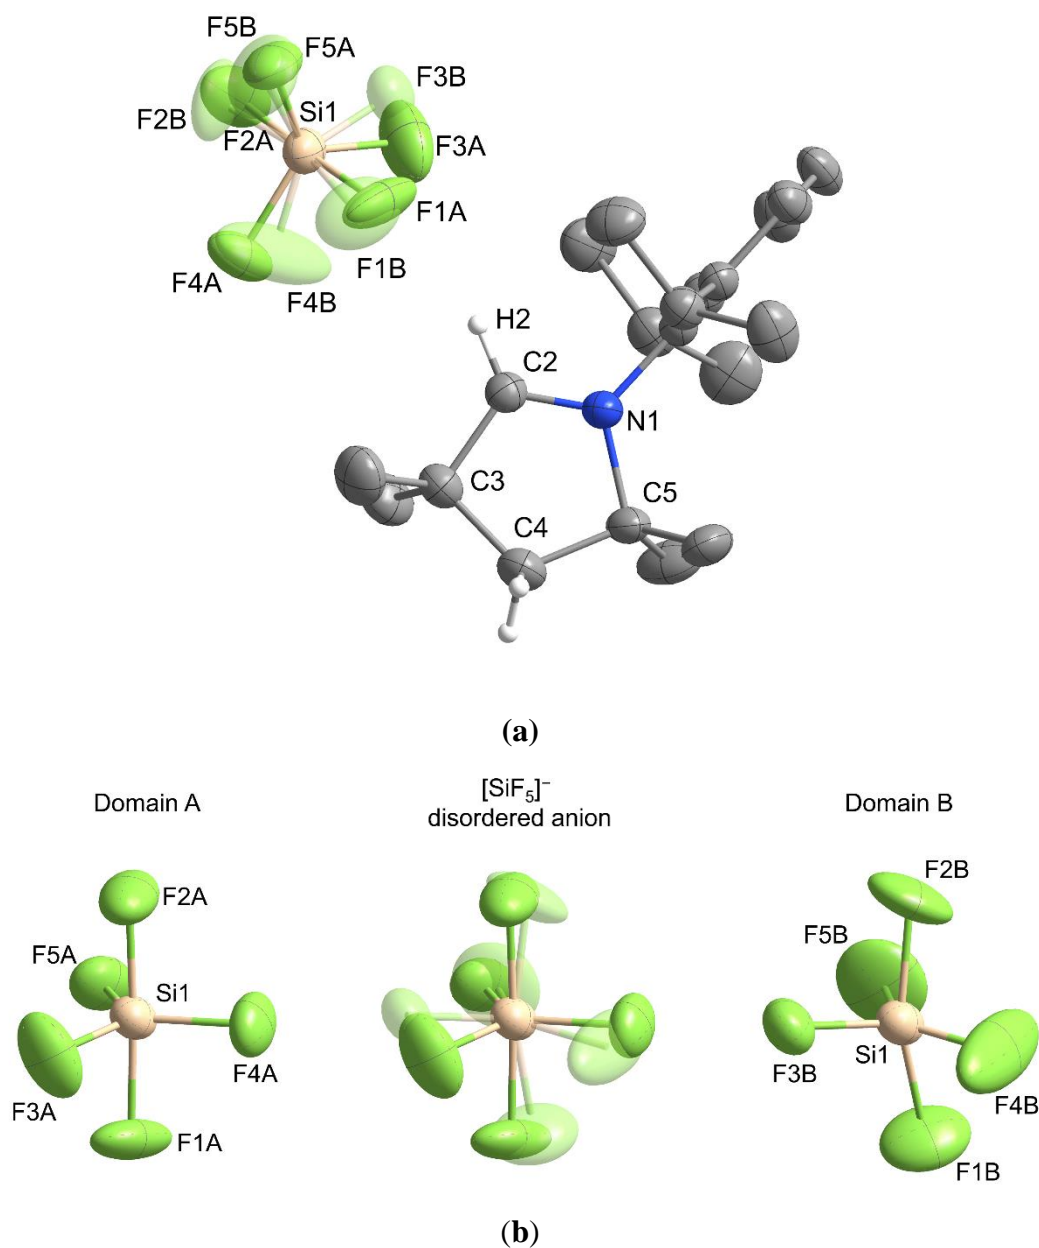

**Figure S31.** Structure of the disordered  $[\text{MeCAACH}][\text{SiF}_5]$ : (a) asymmetric unit of  $[\text{MeCAACH}][\text{SiF}_5]$  with the disordered anion; and (b) structure of the disordered anion. The ellipsoids are drawn at 50% probability. The positions of disordered atoms are shown in domains A and B. For clarity, all hydrogen atoms are omitted and domain B is shaded, when domain A and B are overlapping. The occupancies of domain A and B are 75% and 25%, respectively.



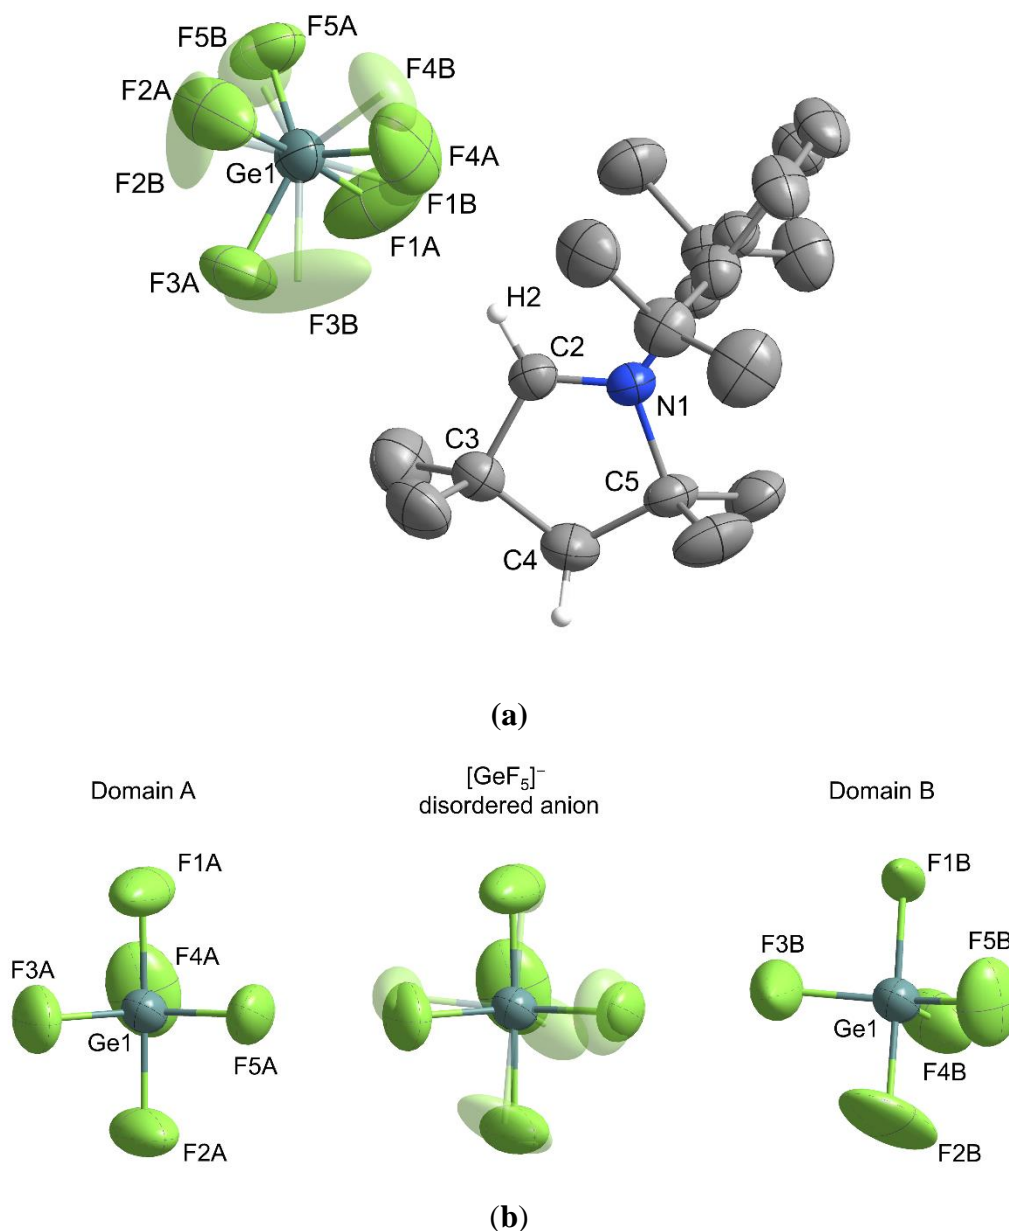

**Figure S32.** Structure of the disordered  $[\text{MeCAACH}][\text{GeF}_5]$ : (a) asymmetric unit of  $[\text{MeCAACH}][\text{GeF}_5]$  with the disordered anion; and (b) structure of the disordered anion. The ellipsoids are drawn at 50% probability. The positions of disordered atoms are shown in domains A and B. For clarity, all hydrogen atoms are omitted and domain B is shaded, when domain A and B are overlapping. The occupancies of domain A and B are 67% and 33%, respectively.

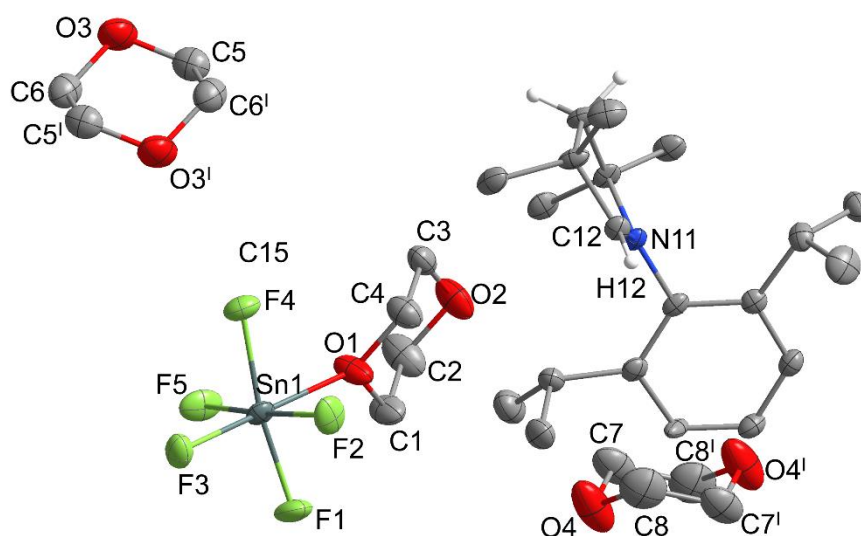

**Figure S33.** Crystal structure of  $[\text{MeCAACH}][(\text{dioxane})\text{SnF}_5] \cdot \text{dioxane}$  with solvent molecules. The ellipsoids are drawn at 50% probability. For clarity, all hydrogen atoms are omitted except those on the heterocyclic ring.

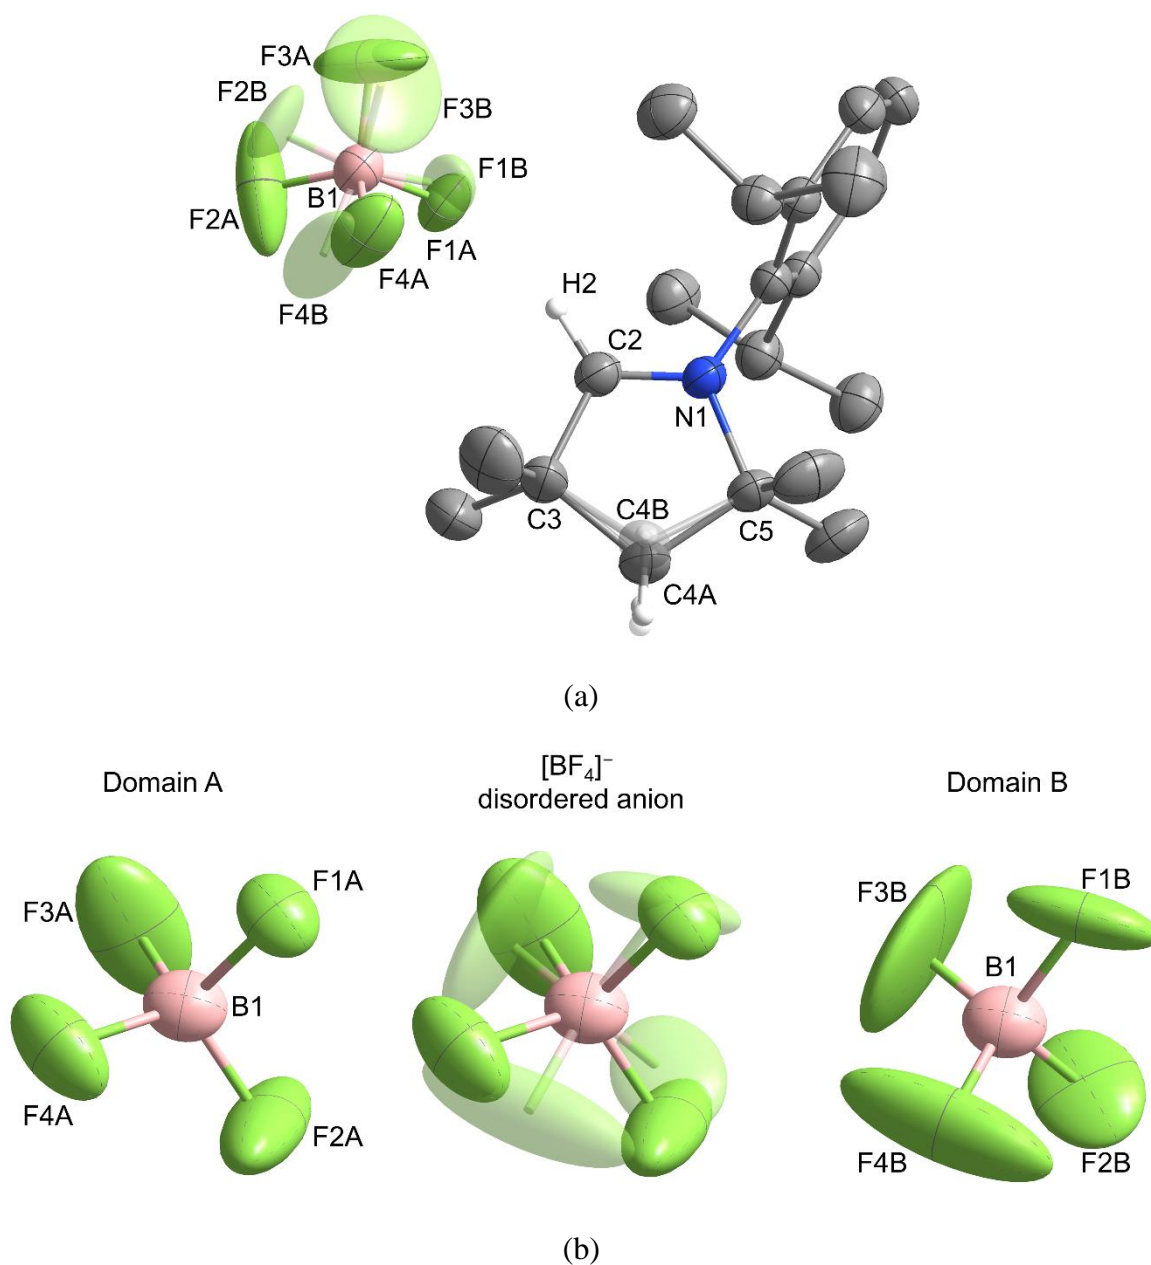

**Figure S34.** Structure of the disordered [MeCAACH][BF<sub>4</sub>]: (a) asymmetric unit of [MeCAACH][BF<sub>4</sub>] with the disordered anion; and (b) structure of the disordered anion. The ellipsoids are drawn at 50% probability. The positions of disordered atoms are shown in domains A and B. For clarity, all hydrogen atoms are omitted and domain B is shaded, when domain A and B are overlapping. The occupancies of domain A and B are 73% and 27%, respectively.

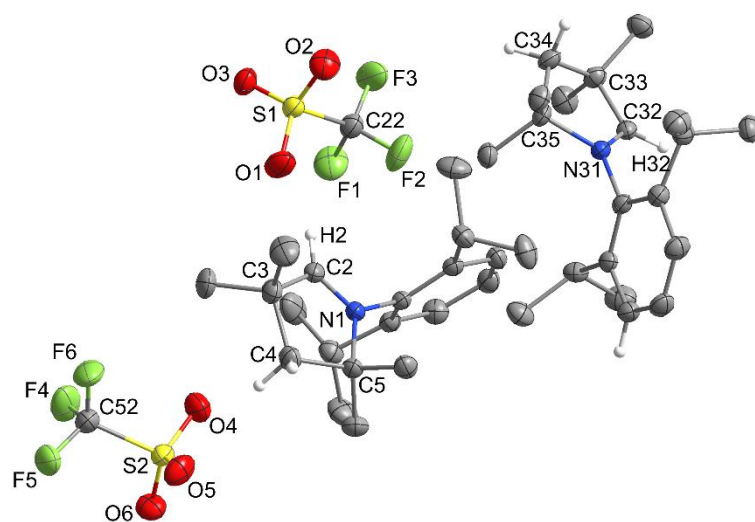

**Figure S35.** Structure of the asymmetric unit of [<sup>Me</sup>CAACH][OTf]. The ellipsoids are drawn at 50% probability. For clarity, all hydrogen atoms are omitted except those on the heterocyclic ring.
